# 1 The landscape of selection in 551 Esophageal Adenocarcinomas defines 2 genomic biomarkers for the clinic

3  
4 Frankell AM<sup>1</sup>, Jammula S<sup>2</sup>, Li X<sup>1</sup>, Contino G<sup>1</sup>, Killcoyne S<sup>1,3</sup>, Abbas S<sup>1</sup>, Perner J<sup>2</sup>, Bower L<sup>2</sup>,  
5 Devonshire G<sup>2</sup>, Ococks E<sup>1</sup>, Grehan N<sup>1</sup>, Mok J<sup>1</sup>, O'Donovan M<sup>4</sup>, MacRae S<sup>1</sup>, Eldridge M<sup>2</sup>, Tavare S<sup>2</sup>,  
6 Fitzgerald RC<sup>1</sup> and the Oesophageal Cancer Clinical and Molecular Stratification (OCCAMS)  
7 Consortium<sup>5</sup>

8

9 <sup>1</sup> MRC cancer unit, Hutchison/MRC research centre, University of Cambridge, Cambridge, UK

10 <sup>2</sup> CRUK Cambridge institute, University of Cambridge, Cambridge, UK.

11 <sup>3</sup> European Molecular Biology Laboratory, European Bioinformatics Institute (EMBL-EBI), Hinxton, UK

12 <sup>4</sup> Department of Histopathology, Cambridge University Hospital NHS Trust, Cambridge, UK

13 <sup>5</sup> A full list of contributors from the OCCAMS Consortium is available at the end of the manuscript

## 14 **Abstract:**

15 Esophageal Adenocarcinoma (EAC) is a poor prognosis cancer type with rapidly rising incidence. Our  
16 understanding of genetic events which drive EAC development is limited and there are few molecular  
17 biomarkers for prognostication or therapeutics. We have accumulated a cohort of 551 genomically  
18 characterised EACs (73% WGS and 27% WES) with clinical annotation and matched RNA-seq. Using a  
19 variety of driver gene detection methods, we discover 77 EAC driver genes (73% novel) and 21 non-  
20 coding driver elements (95% novel), and describe mutation and CNV types with specific functional  
21 impact. We identify a mean of 4.4 driver events per case derived from both copy number events and  
22 mutations. We compare driver mutation rates to the exome-wide mutational excess calculated using  
23 Non-synonymous vs Synonymous mutation rates (dNdS). We observe mutual exclusivity or co-  
24 occurrence of events within and between a number of EAC pathways (GATA factors, Core Cell cycle  
25 genes, TP53 regulators and the SWI/SNF complex) suggestive of important functional relationships.  
26 These driver variants correlate with tumour differentiation, sex and prognosis. Poor prognostic  
27 indicators (SMAD4, GATA4) are verified in independent cohorts with significant predictive value. Over

28 50% of EACs contain sensitising events for CDK4/6 inhibitors which are highly correlated with clinically  
29 relevant sensitivity in a panel EAC cell lines and organoids.

30

## 31 **Introduction**

32 Esophageal cancer is the eighth most common form of cancer world-wide and the sixth most  
33 common cause of cancer related death<sup>1</sup>. Esophageal Adenocarcinoma (EAC) is the predominant  
34 subtype in the west, including the UK and the US. The incidence of EAC in such countries has been  
35 rapidly rising, with a seven-fold increase in incidence over the last 35 years in the US<sup>2</sup>. EAC is a highly  
36 aggressive neoplasm, usually presenting at a late stage and is generally resistant to chemotherapy,  
37 leading to five-year survival rates below 15%<sup>3</sup>. It is characterised by very high mutation rates in  
38 comparison to other cancer types<sup>4</sup> but also, paradoxically, there is a paucity of recurrently mutated  
39 genes. EACs also display dramatic chromosomal instability and thus may be classified as a C-type  
40 neoplasm which may be driven mainly by structural variation rather than mutations<sup>5,6</sup>. Currently our  
41 understanding of precisely which genetic events drive the development of EAC is highly limited and  
42 consequentially there is a paucity of molecular biomarkers for prognosis or targeted therapeutics  
43 available in the clinic.

44 Driver events undergoing positive selection during cancer evolution are a small proportion  
45 of total number of genetic events that occur in each tumour<sup>7</sup>. Methods to differentiate driver  
46 mutations from passenger mutations use features associated with known driver events to detect  
47 regions of the genome, often genes, in which mutations are enriched for these features<sup>8</sup>. The  
48 simplest of these features is the tendency of a mutation to co-occur with other mutations in the  
49 same gene at a high frequency, as detected by MutsigCV<sup>9</sup>. MutsigCV has been applied on several  
50 occasions to EAC cohorts<sup>6,10,11</sup> and has identified ten known cancer genes as high confidence EAC  
51 drivers (TP53, CDKN2A, SMAD4, ARID1A, ERBB2, KRAS, PIK3CA, SMARCA4, CTNNB1 and FBXW7).

52 Analysis of the non-coding genome has been performed by the PCAWG ICGC analysis and identified  
53 a significantly mutated enhancer associated with TP53TG1<sup>12</sup>. However these analyses leave most  
54 EAC cases with only one known driver mutation, usually TP53, due to the low frequency at which  
55 other drivers occur. Equivalent analyses in other cancer types have identified three or four drivers  
56 per case<sup>13,14</sup>. Similarly, detection of copy number driver events in EAC has relied on identifying  
57 regions of the genome recurrently deleted or amplified, as detected by GISTIC<sup>10,15-18</sup>. However,  
58 GISTIC identifies relatively large regions of the genome, often containing hundreds of genes, with  
59 little indication of which specific gene-copy number aberrations (CNAs) may actually confer a  
60 selective advantage. There are also several non-selection based mechanisms which can cause  
61 recurrent CNAs, such as fragile sites where a low density of DNA replication origins causes frequent  
62 structural events at a particular loci. These have not been differentiated properly from selection  
63 based recurrent CNAs<sup>19</sup>. Epigenetic events, for example methylation, may also be important sources  
64 of driver events in EAC but are much more difficult to assess formally for selection.

65         Without proper annotation of the genomic variants which drive the biology of EAC tumours  
66 we are left with a very large number of events, most of which are likely to be inconsequential,  
67 making it extremely difficult to detect statistical associations between genomic variants and various  
68 biological and clinical parameters. To address these issues, we have accumulated a cohort of 551  
69 genomically characterised EACs using our esophageal ICGC project, which have high quality clinical  
70 annotation, associated whole genome sequencing (WGS) and RNA-seq on cases with sufficient  
71 material. We have augmented our ICGC WGS cohort with publically available whole exome<sup>20</sup> and  
72 whole genome sequencing<sup>21</sup> data. We have applied a number of complementary driver detection  
73 tools to this cohort, using a range of driver associated features combined with analyses of RNA  
74 expression to produce a comprehensive assessment and characterisation of mutations and CNAs  
75 under selection in EAC. We then use these events to define functional cell processes that have been  
76 selectively dysregulated in EAC and identify novel, clinically relevant biomarkers for prognostication,

77 which we have verified in independent cohorts. Finally, we have used this compendium of EAC  
78 driver variants to provide an evidence base for targeted therapeutics, which we have tested *in vitro*.

79

## 80 **Results**

### 81 **A Compendium of EAC driver events and their functional effects**

82 In 551 EACs we called a total of 11,813,333 single nucleotide variants (SNVs) and small insertions or  
83 deletions (Indels), with a median of 6.4 such mutations / Mb (supplementary figure 1), and 286,965  
84 copy number aberrations (CNAs). We also identified 134,697 structural variants (SVs) in WGS cases.  
85 Mutations or copy number variants under selection were detected using specific driver associated-  
86 mutation features (Fig 1A). We use several complementary driver detection tools to detect each  
87 feature, and each tool underwent quality control to ensure reliability of results (see methods). These  
88 features include highly recurrent mutations within a gene (dNdScv<sup>22</sup>, ActivedriverWGS<sup>23</sup>,  
89 MutsigCV2<sup>9</sup>), high functional impact mutations within a gene (OncodriveFM<sup>24</sup>, ActivedriverWGS<sup>23</sup>),  
90 mutation clustering (OncodriveClust<sup>25</sup>, eDriver<sup>26</sup> and eDriver3D<sup>27</sup>) and recurrent amplification or  
91 deletion of genes (GISTIC<sup>15</sup>) undergoing concurrent over or under-expression (see methods) (Fig  
92 1A)<sup>8</sup>.

93 These complementary methods produced highly significant agreement in calling EAC driver  
94 genes, particularly within the same feature-type (supplementary figure 2) and on average more than  
95 half of the genes identified by one feature were also identified by other features (Fig 1B). In total  
96 seventy six EAC driver genes were discovered, 86% of which have not been detected in EAC  
97 previously<sup>10,11,16-18,20</sup> and 69% are known drivers in pan-cancer analyses giving confidence in our  
98 methods<sup>22,28,29</sup>. To detect driver elements in the non-coding genome we used ActiveDriverWGS<sup>23</sup> a  
99 recently benchmarked<sup>30</sup> method using both function impact prediction and recurrence to determine  
100 driver status (Fig 1C, supplementary figure 3). We discovered 21 non-coding driver elements using

101 this method. We have recovered several known non-coding driver elements from the pan-cancer  
102 PCAWG analysis<sup>12</sup> including an enhancer on chr7 linked to TP53TG1, a gene required for TP53 action,  
103 the only non-coding driver found in EAC in PCAWG and the promoter/5'UTR regions of PTDSS1 and  
104 WRD74 which are novel in EAC but were found in other cancer types. We also identified completely  
105 novel non-coding cancer driver elements including in the 5'UTR of MMP24 and promoters of two  
106 related histones (HIST1H2BO and HIST1H2AM).

107 EAC is notable among cancer types for harbouring a high degree of chromosomal  
108 instability<sup>21</sup>. Using GISTIC we identified 149 recurrently deleted or amplified loci across the genome  
109 (Fig 2A). To determine which genes within these loci confer a selective advantage when they  
110 undergo CNAs we use a subset of 116 cases with matched RNA-seq to detect genes within these loci  
111 in which homozygous deletion or amplification causes a significant under or over-expression  
112 respectively, a prerequisite for selection of CNAs. The majority of genes in these regions showed no  
113 significant CN associated expression change (74%), although work in larger cohorts suggests we may  
114 be underpowered to detect small expression changes<sup>31</sup>. We observed highly significant expression  
115 changes in 17 known cancer genes within GISTIC peaks such as ERBB2, KRAS and SMAD4 which we  
116 designate high-confidence EAC drivers. We also found five tumour suppressor genes where copy  
117 number loss was not necessarily associated with expression modulation but tightly associated with  
118 presence of mutations leading to LOH, for example ARID1A and CDH11. CDH11 was not identified by  
119 our driver gene detection methods but this would suggest it may be a promising candidate for  
120 further validation. To determine whether copy number changes in genes not previously associated  
121 with cancer may contribute to oncogenesis we searched for genes with similar expression-CN profile  
122 as most of our high-confidence drivers (see methods). We found 140 such cases which we  
123 designated "candidate copy number (CN) drivers" (supplementary tables 1-4). Not all candidate  
124 drivers are likely to be true CN-drivers. However, several candidate drivers such as ZNF131, YES1 and  
125 PIBF1 are not accompanied by other drivers in their GISTIC peak and contain extrachromosomal-like  
126 events, hence are promising candidates for further study.

127           In a subset of GISTIC loci, we observed extremely high copy number amplification,  
128 commonly greater than 100 copies, and these loci were highly correlated with presence of CN-  
129 drivers (Ploidy adjusted Copy number >10, Wilcox test,  $p < 10^{-6}$ ) (supplementary figure 4). We use  
130 copy number adjusted ploidy to define amplifications as it produces superior correlation with  
131 expression data than absolute CN alone. Ploidy of our samples varies from 2-6 (3.5 on average) and  
132 hence Ploidy adjusted copy number of >10 cut off translates into >20-60 absolute copies (on average  
133 35 copies). To discern a mechanism for these ultra-high amplifications we assessed structural  
134 variants (SVs) associated with these events and the copy number steps surrounding them. For many  
135 of these events the extreme amplification was produced largely from a single copy number step the  
136 edges of which were supported by structural variants with ultra-high read support. Two examples  
137 are shown in Fig 2B and further examples in supplementary figure 5. In the first example  
138 circularisation and amplification initially occurred around MYC but subsequently incorporated ERBB2  
139 from an entirely different chromosome and in the second an inversion has been followed by  
140 circularisation and amplification of KRAS. A pattern of extrachromosomal amplification via double  
141 minutes has been previously noted in EAC<sup>21</sup>, and hence we refer to this amplification class with  
142 ultra-high amplification (Ploidy adjusted Copy number >10) as 'extrachromosomal-like'. Several  
143 deletion loci co-align with fragile sites (Fig 2A). Most deletion loci were dominated by heterozygous  
144 deletions while a small subset had a far higher percentage of homozygous deletions including  
145 CDKN2A and several associated with fragile site loci (Fig 2A). For some cases we may have been  
146 unable to identify drivers in loci simply because the aberrations do not occur in the smaller RNA-seq  
147 matched cohort.

148           We found extrachromosomal-like amplifications had an extreme and highly penetrant  
149 effects on expression while moderate amplification (ploidy adjusted copy number > 2) and  
150 homozygous deletion had highly significant (Wilcox test,  $p < 10^{-4}$  and  $p < 10^{-3}$  respectively) but less  
151 dramatic effects on expression with a lower penetrance (Fig 2C). This lack of penetrance was  
152 associated with low cellularity (fisher's exact test, expression cut off = 2.5 normalised FPKM,  $p < 0.01$ )

153 in amplified cases but also likely reflects that genetic mechanisms other than gene-dosage can  
154 modulate expression in a rearranged genome. We also detected several cases of over expression or  
155 complete expression loss without associated CN changes which may reflect non-genetic mechanisms  
156 for driver dysregulation. For example, one case overexpressed ERBB2 at 28-fold median expression  
157 however had entirely diploid CN in and surrounding ERBB2 and a second case contained almost  
158 complete loss of SMAD4 expression (0.008-fold median expression) despite possessing 5 copies of  
159 SMAD4.

160

### 161 **Landscape of driver Events in EAC**

162 The overall landscape of driver gene mutations and copy number alterations per case is depicted in  
163 Fig 3A. These comprise both oncogenes and tumour suppressor genes activated or repressed via  
164 different mechanisms. Occasionally different types of events are selected for in the same gene, such  
165 as KRAS and ERBB2 which both harbour activating mutations and amplifications in 19% and 18% of  
166 cases respectively. Passenger mutations occur by chance in most driver genes. To quantify this we  
167 have used the observed:expected mutation ratios (calculated by dNdScv) to estimate the percentage  
168 of driver mutations in each gene and in different mutation classes. For many genes, only specific  
169 mutation classes appear to be under selection. Many tumour suppressor genes; ARID2, RNF43,  
170 ARID1B for example, are only under selection for truncating mutations; ie splice site, nonsense and  
171 frameshift Indel mutations, but not missense mutations which are passengers. However, oncogenes,  
172 like ERBB2, only contain missense drivers which form clusters to activate gene function in a specific  
173 manner. Where a mutation class is <100% driver mutations, mutational clustering can help us define  
174 the driver vs passenger status of a mutation (supplementary figure 6). Clusters of mutations  
175 occurring in EAC or mutations on amino acids which are mutation hotspots in other cancer types<sup>32</sup>  
176 (supplementary table 5) are indicated in Fig 3A. Novel EAC drivers of particular interest include B2M,  
177 a core component of the MHC class I complex and resistance marker for Immunotherapy<sup>33</sup>, MUC6 a

178 secreted glycoprotein involved in gastric acid resistance and ABCB1 a channel pump protein which is  
179 associated with multiple instances of drug resistance<sup>34</sup>. We note that several of these drivers have  
180 been previously associated with gastric and colorectal cancer (supplementary table 6)<sup>14,35</sup>. Lollipop  
181 plots showing primary sequence distribution of mutations in these genes are provided  
182 (supplementary data).

183         The identification of driver events provides a rich information about the molecular history of  
184 each EAC tumour. We detect a median of five events in driver genes per tumour (IQR = 3-7, Mean =  
185 5.6) and only a very small fraction of cases have no such events detected (6 cases, 1%). When we  
186 remove the predicted percentage of passenger mutations using dnds ratios we find a mean of 4.4  
187 true driver events per case which derive more commonly from mutations than CN events (Fig 3B).  
188 Using hierarchal clustering of drivers we noted that TP53 mutant cases had significantly more CN  
189 drivers (Wilcox test,  $p = 0.0032$ , supplementary figure 7). dNdScv, one of the driver gene detection  
190 methods used, also analyses the genome-wide excess of non-synonymous mutations based on  
191 expected mutation rates to assess the total number of driver mutations across the exome which is  
192 calculated at 5.4 (95% CIs: 3.5-7.3) in comparison to 2.7 driver mutations which we calculate in our  
193 gene-centric analysis after passenger removal. This suggests low frequency driver genes may be  
194 prevalent in the EAC mutational landscape (see discussion). Further analysis suggests these missing  
195 mutations are mostly missense mutations and our gene-centric analysis captures almost all  
196 predicted splice and nonsense drivers (supplementary figure 8). Some of our methods use  
197 enrichment of nonsense and splice mutations as a marker of driver genes and hence have a higher  
198 sensitivity for these mutations.

199         To better understand the functional impact of driver mutations we analysed expression of  
200 driver genes with different mutation types and compared their expression to normal tissue RNA,  
201 which was sequenced alongside our tumour samples (Fig 3C). Since surrounding squamous  
202 epithelium is a fundamentally different tissue, from which EAC does not directly arise, we have used



203 duodenum and gastric cardia samples as gastrointestinal phenotype controls, likely to be similar to  
204 the, as yet unconfirmed, tissue of origin in EAC. A large number of driver genes have upregulated  
205 expression in comparison to normal controls, for example TP53 has upregulated RNA expression in  
206 WT tumour tissue and in cases with missense (see non-truncating Fig 3C) mutations but RNA  
207 expression is lost upon gene truncation. In depth analysis of different TP53 mutation types reveals  
208 significant heterogeneity within non-truncating mutations, for example R175H mutations correlate  
209 with low RNA expression (supplementary figure 9). Normal tissue expression of CDKN2A suggests  
210 that CDKN2A is generally activated in EAC, likely due to genotoxic or other cancer-associated  
211 stresses<sup>36</sup> and returns to physiologically normal levels when deleted. Heterogeneous expression in  
212 WT CDKN2A cases suggest a different mechanism of inhibition such as methylation in some cases.  
213 Overexpression of other genes in wild type tumours, such as SIN3A, may confer a selective  
214 advantage due to their oncogenic properties, in this case cooperating with MYC, which is also  
215 overexpressed in EACs (Fig 3C). A smaller number of driver genes are downregulated in EAC tissue-  
216 3/4 of these (GATA4, GATA6 and MUC6) are involved in the differentiated phenotype of  
217 gastrointestinal tissues and may be lost with tumour de-differentiation. Driving alterations in these  
218 genes have been observed in other GI cancers<sup>14,37,38</sup> however their oncogenic mechanism is  
219 unknown. In most genes we did not observe expression loss at the RNA level with truncation, for  
220 instance ARID1A (supplementary figure 10).

221

## 222 **Dysregulation of specific pathways and processes in EAC**

223 It is known that selection preferentially dysregulates certain functionally related groups of genes and  
224 biological pathways in cancer<sup>39</sup>. This phenomenon is highly evident in EAC, as shown in Fig 4 which  
225 depicts the functional relationships between EAC drivers. This provides greater functional  
226 homogeneity to the landscape of driver events.

227           While TP53 is the dominant driver in EAC, 28% of cases remain TP53 wildtype. MDM2 is a E3  
228 ubiquitin ligase that targets TP53 for degradation. Its selective amplification and overexpression is  
229 mutually exclusive with TP53 mutation suggesting it can functionally substitute the effect of TP53  
230 mutation via its degradation. Similar mutually exclusive relationships are observed between; KRAS  
231 and ERBB2, GATA4 and GATA6 and Cyclin genes (CCNE1, CCND1 and CCND3). Activation of the Wnt  
232 pathway occurs in 19% of cases either by mutation of phospho-residues at the N terminus of  $\beta$ -  
233 catenin, which prevent degradation, or loss of Wnt destruction complex components like APC. Many  
234 different chromatin modifying genes, often belonging to the SWI/SNF complex, are also selectively  
235 mutated (31% of cases). In contrast SWI/SNF genes are co-mutated significantly more often than we  
236 would expect by chance (fisher's exact test,  $p < 0.01$  see methods), suggesting an increased advantage  
237 to further mutations once one has been acquired. We also assessed mutual exclusivity and co-  
238 occurrence in genes in different pathways and between pathways themselves (Fig 4B). Of particular  
239 note are co-occurring relationships between TP53 and MYC, GATA6 and SMAD4, Wnt and Immune  
240 pathways as well as mutually exclusive relationships between ARID1A and MYC, gastrointestinal (GI)  
241 differentiation and RTK pathways and SWI-SNF and DNA-Damage response pathways. Wnt  
242 dysregulation has been previously linked to immune escape<sup>40</sup> and interestingly was also associated  
243 with hyper-mutated cases ( $> 50,000$  SNVs or Indels, fisher's exact test,  $p = 0.021$ , OR= 2.4). We were  
244 able to confirm some of these relationships in independent cohorts in different cancer types  
245 (supplementary table 7) suggesting some of these may be pan-cancer phenomenon. As shown in Fig  
246 4, all of these pathways interact to stimulate the G1 to S phase transition of the cell cycle via  
247 promoting phosphorylation of Rb, although many of these pathways have multiple oncogenic or  
248 tumour suppressive functions.

249           A number of other driver genes have highly related functional roles including core  
250 transcriptional components (TAF1 and POLQ), drivers of immune escape (JAK1 and B2M<sup>33</sup>), cell  
251 adhesion receptors (CDH1, CHDL and PCDH17), core ribosome components (ELF3 and RPL22), core

252 RNA processing components (GPATCH8 and COIL), ion channels (KCNQ3 and TRPA1) and Ephrin  
253 type-A receptors (EPHA2 and EPHA3).

254

#### 255 **Clinical significance of driver variants**

256 Events undergoing selection during cancer evolution influence tumour biology and thus impact  
257 tumour aggressiveness, response to treatment and patient prognosis as well as other clinical  
258 parameters. Clinical-genomic correlations can provide useful biomarkers but also give insights into  
259 the biology of these events.

260 Univariate Cox regression was performed for events in each driver gene with driver events  
261 occurring in greater than 5% of EACs (ie after removal of predicted passengers, 16 genes) to detect  
262 prognostic biomarkers (Fig 5A). Events in two genes conferred significantly poorer prognosis after  
263 multiple hypothesis correction, GATA4 amplification (HR : 0.54 , 95% CI : 0.38 – 0.78, *P* value =  
264 0.0008) and SMAD4 mutation or homozygous deletion (HR : 0.60 , 95% CI : 0.42 – 0.84, *P* value =  
265 0.003). Both genes remained significant in multivariate Cox regression including pathological TNM  
266 staging, resection margin, curative vs palliative treatment intent and differentiation status (GATA4 =  
267 HR adjusted : 0.47, 95% CIs adjusted : 0.29 - 0.76, *P* value = 0.002 and SMAD4 = HR adjusted : 0.61,  
268 95% CI adjusted : 0.40 – 0.94, *P* value = 0.026). 31% of EACs contain either SMAD4 mutation or  
269 homozygous deletion or GATA4 amplification and cases with both genes altered had a poorer  
270 prognosis (Fig 5B). We validated the poor prognostic impact of SMAD4 events in an independent  
271 TCGA gastroesophageal cohort (HR = 0.58, 95% CI = 0.37 – 0.90, *P* value = 0.014) (Fig 5C) and we also  
272 found GATA4 amplifications were prognostic in a cohort of TCGA pancreatic cancers (HR = 0.38 95%  
273 CI: 0.18 – 0.80, *P* value = 0.011) (Fig 5D), the only available cohort containing a feasible number of  
274 GATA4 amplifications. The prognostic impact of GATA4 has been suggested in previously published  
275 independent EAC cohort<sup>17</sup> although it did not reach statistical significance after FDR correction and  
276 SMAD4 expression loss has been previously linked to poor prognosis in EAC<sup>41</sup>. We also noted stark

277 survival differences between cases with SMAD4 events and cases in which TGF $\beta$  receptors were  
278 mutated (Fig 5E, HR = 5.6, 95% CI : 1.7 – 18.2, *P* value = 0.005) in keeping with the biology of the  
279 TGF $\beta$  pathway where non-SMAD TGF $\beta$  signalling is known to be oncogenic<sup>42</sup>.

280 In addition to survival analyses we also assessed driver gene events for correlation with  
281 various other clinical factors including differentiation status, sex, age and treatment response. We  
282 found Wnt pathway mutations had a strong association with well differentiated tumours (*p*=0.001,  
283 OR = 2.9, fisher's test, see methods, Fig 5F). We noted interesting differences between female  
284 (*n*=81) and male (*n*=470) cases. Female cases were enriched for KRAS mutation (*p* = 0.001, fisher's  
285 exact test) and TP53 wildtype status (*p* = 0.006, fisher's exact test) (Fig 5G). This is of particular  
286 interest given the male predominance of EAC<sup>3</sup>.

287

#### 288 **Targeted therapeutics using EAC driver events.**

289 The biological distinctions between normal and cancer cells provided by driver events can be used to  
290 derive clinical strategies for selective cancer cell killing. To investigate whether the driver events in  
291 particular genes and/or pathways might sensitise EAC cells to certain targeted therapeutic agents  
292 we used the Cancer Biomarkers database<sup>43</sup>. We calculated the percentage of our cases which  
293 contain EAC-driver biomarkers of response to each drug class in the database (summary shown Fig  
294 6A, and full data supplementary table 8). Aside from TP53, which has been problematic to target  
295 clinically so far, we found a number of drugs with predicted sensitivity in >10% of EACs including  
296 EZH2 inhibitors for SWI/SNF mutant cancers (23%, and 33% including other SWI/SNF EAC  
297 drivers), and BET inhibitors which target KRAS activated and MYC amplified cases (25%). However,  
298 by far the most significantly effective drug was predicted to be CDK4/6 inhibitors where >50% of  
299 cases harboured sensitivity causing events in the receptor tyrosine kinase (RTK) and core cell cycle  
300 pathways (eg in CCND1, CCND3 and KRAS).

301 To verify that these driver events would also sensitise EAC tumours to such inhibitors we  
302 used a panel of thirteen EAC or Barrett's HGD cell lines, which share similar genomic changes and  
303 driver events<sup>44,45</sup>, which have undergone whole genome sequencing<sup>46</sup> and assessed them for  
304 presence of EAC driver events (Fig 6B). The mutational landscape of these lines was broadly  
305 representative of EAC tumours. We found that the presence of cell cycle and or RTK activating driver  
306 events was highly correlated with response to two FDA approved CDK4/6 inhibitors, Ribociclib and  
307 Palbociclib and several cell lines were sensitive below maximum tolerated blood concentrations in  
308 humans (Fig 6B, supplementary table 9, supplementary figure 11)<sup>47</sup>. Such EAC cell lines had  
309 comparable sensitivity to T47D which is derived from an ER +ve breast cancer where CDK4/6  
310 inhibitors have been FDA approved. We noted three cell lines without sensitising events which were  
311 highly resistant, with little drug effect even at 4000 nanomolar concentrations, similar to a known Rb  
312 mutant resistant line breast cancer cell line (MDA-MB-468). Two of these three cell lines harbour  
313 amplification of CCNE1 which is known to drive resistance to CDK4/6 inhibitors by bypassing CDK4/6  
314 and causing Rb phosphorylation via CDK2 activation<sup>48</sup>. To verify these effects in a more  
315 representative model of EAC we treated three whole genome sequenced EAC organoid cultures<sup>49</sup>  
316 with Palbociclib and Ribociclib as well as a more recently approved CDK4/6 inhibitor, Abemaciclib. As  
317 was observed in cell lines, Cell cycle and RTK driver events were present only in the more sensitive  
318 organoids and CCNE1 activation in the most resistant (Fig 6C). We found Abemaciclib to be  
319 significantly more potent in comparison to both other CDK4/6 inhibitors, both in organoids and cell  
320 lines (supplementary figure 10). We note that the maximum tolerated blood doses of Abermaciclib  
321 achieved in the clinic were also higher than the other CDK4/6 inhibitors<sup>50</sup>, within the range of  
322 sensitivity achieved in several cell lines and organoids cultures.

323

324

325

## 326 **Discussion**

327 We present here a detailed catalogue of coding and non-coding genomic events that have been  
328 selected for during the evolution of esophageal adenocarcinoma. These events have been  
329 characterised in terms of their relative impact, related functions, mutual exclusivity and co-  
330 occurrence and expression in comparison to normal tissues, producing insights into EAC biology. We  
331 have used this set of biologically important gene alterations to identify prognostic biomarkers and  
332 actionable genomic events for personalised medicine.

333 While clinical annotation and matched RNA data is a strength of this study, in some cases we  
334 may have been unable to assess selected variants for survival associations or expression changes  
335 which were detected in the full 551 cohort, due to lack of representation in clinically annotated or  
336 RNA matched sub cohorts. Despite rigorous analyses to detect selected events, assessment of the  
337 global excess of mutations by dNdScv suggests we are unable to detect all events selected in EAC,  
338 similar to many other cancer types<sup>22</sup>. All driver gene detection methods which we have used rely on  
339 driver mutation re-occurrence in a gene to some degree. Many of these undetected driver  
340 mutations are hence likely to be spread across a large number of genes whereby each is mutated at  
341 low frequency across EAC patients. This tendency for low frequency EAC drivers may be responsible  
342 for the low yield of MutsigCV in previous cohorts and may suggest that C-type cancers such as EAC,  
343 are not less 'mutation-driven' than M-type cancers but rather that their mutational drivers are  
344 spread across a larger number of genes<sup>5</sup>. The identification of these very low frequency mutations  
345 will require substantially different detection techniques to those which are currently in wide spread  
346 use and such methods are in development<sup>51</sup> although they require validation. Undoubtedly many  
347 copy number drivers are also left undiscovered and validation of candidates identified here is an  
348 important avenue of future work.

349 While a number of previous reports have attempted to detect EAC drivers, they have had a  
350 limited yield per case for a variety of reasons. The first such study<sup>20</sup> used methods which, despite

351 being well regarded at the time, were subsequently discredited<sup>9</sup>. Hence a number of known false  
352 positive genes (EYS, SYNE1 and CNTTAP5) were erroneously reported as drivers, along with an  
353 additional unknown number of genes. Since then a number of reports, including our own, on  
354 medium and large cohort sizes using MutsigCV<sup>10,11,18</sup> were only able to detect a small number of  
355 mutational driver genes (7, 5 and 15 in each study). By using both a large cohort and more  
356 comprehensive methodologies we have significantly increased this figure to 66 mutational driver  
357 genes (excluding CN drivers). Detection of driver CNAs has previously relied on GISTIC to detect  
358 recurrently mutated regions<sup>10,15-18</sup> but no analyses have been performed to evidence which genes in  
359 these large regions are true drivers. Many of the genes annotated by such papers are unlikely to be  
360 CN drivers from this analysis due to their lack of expression modulation with CNAs (eg YEATS4 and  
361 MCL1), the role of recurrent heterozygous losses to drive LOH in some mutational drivers (ARID1A  
362 and CDH11) or their association with fragile sites (PDE4D, WWOX, FHIT). Conversely, we have been  
363 able to identify novel EAC copy number drivers (eg CCND3, AXIN1, PPM1D and APC).

364 A number of discoveries made in this work require further investigation. Functional  
365 characterisation of many of the driver genes described is needed to understand why they are  
366 advantageous to EAC tumours and how they modify EAC biology. Particularly interesting are the GI  
367 specific genes GATA4, GATA6 and MUC6 which modulate prognosis and have expression loss during  
368 the transition from normal to tumour tissue. Biological pathways and processes that are selectively  
369 dysregulated deserve particular attention in this regard as do the gene pairs or groups with mutually  
370 exclusive or co-occurring relationships such as MYC and TP53 or SWI/SNF factors, suggestive of  
371 particular functional relationships. Prospective clinical work to verify and implement SMAD4 and  
372 GATA4 biomarkers in this study would be worthwhile. While EAC is a poor prognosis cancer type,  
373 significant heterogeneity of survival outcome makes triaging patients in treatment groups an  
374 important part of clinic practice which could be improve using better prognostication. Whole  
375 genome or whole exome sequencing may be impractical for use in the clinic, however targeted NGS  
376 panels to detect mutations and copy number alterations have been implemented to detect genomic

377 biomarkers in a cost effective and sensitive manner for some cancer types<sup>52</sup>. In EAC development of  
378 a customised panel is likely to be required on the basis of this analysis. A number of targeted  
379 therapeutics may provide clinic benefit to EAC cases based on their individual genomic profile. In  
380 particular CDK4/6 inhibitors deserve considerable attention as an option for EAC treatment as they  
381 are, by a significant margin, the treatment to which the most EACs harbour sensitivity-causing driver  
382 events, excluding TP53 as an unlikely therapeutic biomarker. The in vitro validation of these  
383 biomarkers for CDK4/6 inhibitors in EAC is also persuasive of possible clinical benefit using a targeted  
384 approach.

385           In summary this work provides a detailed compendium of mutations and copy number  
386 alterations undergoing selection in EAC which have functional and clinical impact on tumour  
387 behaviour. This comprehensive study provides us with useful insights into the nature of EAC tumours  
388 and should pave the way for evidence based clinical trials in this poor prognosis disease.

389

390

#### 391 **Oesophageal Cancer Clinical and Molecular Stratification (OCCAMS) Consortium:**

392 Rebecca C. Fitzgerald<sup>1</sup>, Ayesha Noorani<sup>1</sup>, Paul A.W. Edwards<sup>1,2</sup>, Nicola Grehan<sup>1</sup>, Barbara Nutzinger<sup>1</sup>,  
393 Caitriona Hughes<sup>1</sup>, Elwira Fidziukiewicz<sup>1</sup>, Jan Bornschein<sup>1</sup>, Shona MacRae<sup>1</sup>, Jason Crawte<sup>1</sup>, Alex  
394 Northrop<sup>1</sup>, Gianmarco Contino<sup>1</sup>, Xiaodun Li<sup>1</sup>, Rachel de la Rue<sup>1</sup>, Maria O'Donovan<sup>1,3</sup>, Ahmad  
395 Miremadi<sup>1,3</sup>, Shalini Malhotra<sup>1,3</sup>, Monika Tripathi<sup>1,3</sup>, Simon Tavaré<sup>2</sup>, Andy G. Lynch<sup>2</sup>, Matthew  
396 Eldridge<sup>2</sup>, Maria Secrier<sup>2</sup>, Lawrence Bower<sup>2</sup>, Ginny Devonshire<sup>2</sup>, Juliane Perner<sup>2</sup>, Sriganesh  
397 Jammula<sup>2</sup>, Jim Davies<sup>5</sup>, Charles Crichton<sup>5</sup>, Nick Carroll<sup>6</sup>, Peter Safranek<sup>6</sup>, Andrew Hindmarsh<sup>6</sup>,  
398 Vijayendran Sujendran<sup>6</sup>, Stephen J. Hayes<sup>7,14</sup>, Yeng Ang<sup>7,8,29</sup>, Shaun R. Preston<sup>9</sup>, Sarah Oakes<sup>9</sup>, Izhar  
399 Bagwan<sup>9</sup>, Vicki Save<sup>10</sup>, Richard J.E. Skipworth<sup>10</sup>, Ted R. Hupp<sup>10</sup>, J. Robert O'Neill<sup>10,23</sup>, Olga Tucker<sup>11,33</sup>,  
400 Andrew Beggs<sup>11,28</sup>, Philippe Tanriere<sup>11</sup>, Sonia Puig<sup>11</sup>, Timothy J. Underwood<sup>12,13</sup>, Fergus Noble<sup>12</sup>, Jack  
401 Owsley<sup>12</sup>, Hugh Barr<sup>15</sup>, Neil Shepherd<sup>15</sup>, Oliver Old<sup>15</sup>, Jesper Lagergren<sup>16,25</sup>, James Gossage<sup>16,24</sup>,  
402 Andrew Davies<sup>16,24</sup>, Fujun Chang<sup>16,24</sup>, Janine Zylstra<sup>16,24</sup>, Ula Mahadeva<sup>16</sup>, Vicky Goh<sup>24</sup>, Francesca D.  
403 Ciccarelli<sup>24</sup>, Grant Sanders<sup>17</sup>, Richard Berrisford<sup>17</sup>, Catherine Harden<sup>17</sup>, Mike Lewis<sup>18</sup>, Ed Cheong<sup>18</sup>,  
404 Bhaskar Kumar<sup>18</sup>, Simon L Parsons<sup>19</sup>, Irshad Soomro<sup>19</sup>, Philip Kaye<sup>19</sup>, John Saunders<sup>19</sup>, Laurence  
405 Lovat<sup>20</sup>, Rehan Haidry<sup>20</sup>, Laszlo Igali<sup>21</sup>, Michael Scott<sup>22</sup>, Sharmila Sothi<sup>26</sup>, Sari Suortamo<sup>26</sup>, Suzy  
406 Lishman<sup>27</sup>, George B. Hanna<sup>31</sup>, Krishna Moorthy<sup>31</sup>, Christopher J. Peters<sup>31</sup>, Anna Grabowska<sup>32</sup>, Richard  
407 Turkington<sup>34</sup>.



408

409 <sup>1</sup> Medical Research Council Cancer Unit, Hutchison/Medical Research Council Research Centre,  
410 University of Cambridge, Cambridge, UK

411 <sup>2</sup> Cancer Research UK Cambridge Institute, University of Cambridge, Cambridge, UK

412 <sup>3</sup> Department of Histopathology, Addenbrooke's Hospital, Cambridge, UK

413 <sup>4</sup> Oxford ComLab, University of Oxford, UK, OX1 2JD

414 <sup>5</sup> Department of Computer Science, University of Oxford, UK, OX1 3QD

415 <sup>6</sup> Cambridge University Hospitals NHS Foundation Trust, Cambridge, UK, CB2 0QQ

416 <sup>7</sup> Salford Royal NHS Foundation Trust, Salford, UK, M6 8HD

417 <sup>8</sup> Wigan and Leigh NHS Foundation Trust, Wigan, Manchester, UK, WN1 2NN

418 <sup>9</sup> Royal Surrey County Hospital NHS Foundation Trust, Guildford, UK, GU2 7XX

419 <sup>10</sup> Edinburgh Royal Infirmary, Edinburgh, UK, EH16 4SA

420 <sup>11</sup> University Hospitals Birmingham NHS Foundation Trust, Birmingham, UK, B15 2GW

421 <sup>12</sup> University Hospital Southampton NHS Foundation Trust, Southampton, UK, SO16 6YD

422 <sup>13</sup> Cancer Sciences Division, University of Southampton, Southampton, UK, SO17 1BJ

423 <sup>14</sup> Faculty of Medical and Human Sciences, University of Manchester, UK, M13 9PL

424 <sup>15</sup> Gloucester Royal Hospital, Gloucester, UK, GL1 3NN

425 <sup>16</sup> Guy's and St Thomas's NHS Foundation Trust, London, UK, SE1 7EH

426 <sup>17</sup> Plymouth Hospitals NHS Trust, Plymouth, UK, PL6 8DH

427 <sup>18</sup> Norfolk and Norwich University Hospital NHS Foundation Trust, Norwich, UK, NR4 7UY

428 <sup>19</sup> Nottingham University Hospitals NHS Trust, Nottingham, UK, NG7 2UH

429 <sup>20</sup> University College London, London, UK, WC1E 6BT

430 <sup>21</sup> Norfolk and Waveney Cellular Pathology Network, Norwich, UK, NR4 7UY

431 <sup>22</sup> Wythenshawe Hospital, Manchester, UK, M23 9LT

432 <sup>23</sup> Edinburgh University, Edinburgh, UK, EH8 9YL

433 <sup>24</sup> King's College London, London, UK, WC2R 2LS

434 <sup>25</sup> Karolinska Institutet, Stockholm, Sweden, SE-171 77

435 <sup>26</sup> University Hospitals Coventry and Warwickshire NHS, Trust, Coventry, UK, CV2 2DX

436 <sup>27</sup> Peterborough Hospitals NHS Trust, Peterborough City Hospital, Peterborough, UK, PE3 9GZ

437 <sup>28</sup> Institute of Cancer and Genomic sciences, University of Birmingham, B15 2TT

438 <sup>29</sup> GI science centre, University of Manchester, UK, M13 9PL.

439 <sup>30</sup> Queen's Medical Centre, University of Nottingham, Nottingham, UK, NG7 2UH

440 <sup>31</sup> Department of Surgery and Cancer, Imperial College London, UK, W2 1NY

441 <sup>32</sup> Queen's Medical Centre, University of Nottingham, Nottingham, UK

442 <sup>33</sup> Heart of England NHS Foundation Trust, Birmingham, UK, B9 5SS.

443 <sup>34</sup> Centre for Cancer Research and Cell Biology, Queen's University Belfast, Northern Ireland, UK, BT7  
444 1NN.

445

446

## 447 **Author contributions:**

448 RCF and AMF conceived the overall study. AMF and SJ analysed the genomic data and performed

449 statistical analyses. RCF, AMF and XL designed the experiments. AMF, XL and JM performed the

450 experiments. GC contributed to the Structural variant analysis and data visualisation. SK helped

451 compile the clinical data and aided statistical analyses. JP and SA produced and QC'ed the RNA-seq  
452 data. EO aided the whole genome sequencing of EAC cell lines. SM and NG coordinated the clinical  
453 centres and were responsible for sample collections. ME benchmarked our mutation calling  
454 pipelines. MO led the pathological sample QC for sequencing. LB and GD ran variant calling  
455 pipelines. RCF and ST supervised the research. RCF and ST obtained funding. AMF and RCF wrote the  
456 manuscript. All authors approved the manuscript.

457

458 **The authors declare no competing interests.**

459 **Sequencing data will be deposited in a publicly assessable database before publication**

460 **Code associated with the analysis is available upon request.**

461 **The study was registered (UKCRNID 8880), approved by the Institutional Ethics**  
462 **Committees (REC 07/H0305/52 and 10/H0305/1), and all subjects gave individual**  
463 **informed consent.**

464

465 **OCCAMS was funded by a programme grant from Cancer Research UK (RG66287). We thank**  
466 **the Human Research Tissue Bank, which is supported by the National Institute for Health**  
467 **Research (NIHR) Cambridge Biomedical Research Centre, from Addenbrooke's**  
468 **Hospital. Additional infrastructure support was provided from the CRUK funded**  
469 **Experimental Cancer Medicine Centre.**

470

## 471 **Acknowledgements**

472 We would like to thank Dr. Adam Bass and Dr. Nic Waddel for providing data in Dulak et al 2013 and  
473 Nones et al 2014 respectively, also included in our previous publication Secrier et al 2016. Inclusion

474 of this data allowed augmentation of our ICGC cohort and a greater sensitivity for the detection of  
475 EAC driver genes.

476

## 477 **Figure Legends:**

478 **Figure 1 Detection of EAC driver Genes.** a. Types of driver-associated features used to detect  
479 positive selection in mutations and copy number events with examples of genes containing such  
480 features b. Coding driver genes identified and their driver-associated features. c. Non-coding driver  
481 elements detected and their element types.

482

483 **Figure 2. Copy number variation under positive selection.** a. Recurrent copy number changes across  
484 the genome identified by GISTIC. Frequency of different CNV types are indicated as well as the position  
485 of CNV high confidence driver genes and candidate driver genes. The q value for expression correlation  
486 with amplification and homozygous deletion is shown for each gene within each amplification and  
487 deletion peaks respectively and occasions of significant association between LOH and mutation are  
488 indicated in green. Purple deletion peaks indicate fragile sites. b. Examples of Extrachromosomal-like  
489 amplifications suggested by very high read support SVs at the boundaries of highly amplified regions  
490 produced from a single copy number step. In the first example (bi) two populations of  
491 extrachromosomal DNA are apparent (biii), one amplifying only MYC and the second also  
492 incorporating ERBB2 from a different chromosome. In the second example (bii) an inversion has  
493 occurred before circularization and amplification around KRAS (biv). c. Relationship between copy  
494 number and expression in CN driver genes.

495

496 **Figure 3. The driver gene landscape of Esophageal Adenocarcinoma.** a. Driver mutations or CNVs are  
497 shown for each patient. Amplification is defined as >2 Copy number adjusted ploidy (2 x ploidy of that

498 case) and extrachromosomal amplification as >10 Copy number adjusted ploidy (10 x ploidy for that  
499 case). Driver associated features for each driver gene are displayed to the left. On the right the  
500 percentages of different mutation and copy number changes are displayed, differentiating between  
501 driver and passenger mutations using dNdScv, and the % of predicted drivers by mutation type is  
502 shown. Above the plot are the number of driver mutations per sample with an indication of the mean  
503 (red line = 5). **b.** Assessment of driver event types per case and comparison to exome-wide excess of  
504 mutations generated by dNdScv. **c.** Expression changes in EAC driver genes in comparison to normal  
505 intestinal tissues. Genes with expression changes of note are shown.

506

507 **Figure 4. Biological pathways undergoing selective dysregulation in EAC.** **a.** Biological Pathways  
508 dysregulated by driver gene mutation and/or CNVs. WT cases for a pathway are not shown. Inter  
509 and intra-pathway interactions are described and mutual exclusivities and/or associations between  
510 genes in a pathway are annotated. GATA4/6 amplifications have a mutually exclusive relationship  
511 although this does not reach statistical significance (fisher's exact test  $p=0.07$  OR =0.52). **b.** Pairwise  
512 assessment of mutual exclusivity and association in EAC driver genes and pathways.

513

514 **Figure 5. Clinical significance of Driver events in EAC.** **a.** Hazard ratios and 95% confidence  
515 intervals for Cox regression analysis across all drivers genes with at least a 5% frequency of driver  
516 alterations \* =  $q < 0.05$  after BH adjustment. **b.** Kaplan-Meier curves for EACs with different status of  
517 significant prognostic indicators (GATA4 and SMAD4). **c.** Kaplan-Meier curves for different  
518 alterations in the TGFbeta pathway. **d.** Kaplan-Meier curves showing verification GATA4 prognostic  
519 value in GI cancers using a pancreatic TCGA cohort. **e.** Kaplan-Meier curves showing verification  
520 SMAD4 prognostic value in Gastroesophageal cancers using a gastroesophageal TCGA cohort. **f.**  
521 Differentiation bias in tumours containing events in Wnt pathway driver genes. **g.** Relative frequency  
522 of KRAS mutations and TP53 mutations driver gene events in females vs males (fishers exact test).

523

524 **Figure 6. CDK4/6 inhibitors in EAC. a.** Drug classes for which sensitivity is indicated by EAC driver  
525 genes with data from the Cancer Biomarkers database<sup>36</sup>. **b.** Area under the curve (AUC) of sensitivity  
526 is shown in a panel of 13 EAC and Be high grade dysplasia cell lines with associated WGS and their  
527 corresponding driver events, based on primary tumour analysis. Also AUC is shown for two control  
528 lines T47D, an ER +ve breast cancer line (+ve control) and MDA-MB-468 a Rb negative breast cancer  
529 (-ve control). \*CCNE1 is a known marker of resistance to CDK4/6 inhibitors due to its regulation of  
530 Rb downstream of CDK4/6 hence bypassing the need for CDK4/6 activity (see figure 4). **c.** Response  
531 of organoid cultures to three FDA approved CDK4/6 inhibitors and corresponding driver events.

532

### 533 **Supplementary figure legends**

534 **Supplementary figure 1.** Distribution of small scale mutations (SNVs and Indels) across the 551 EAC  
535 cohort. Red line indicates the median mutations per case (6.4)

536

537 **Supplementary Figure 2. Concordance between driver gene detection methods. A.** Hierarchical  
538 clustering between tools based on gene identified. **B** Genes identified by each tool.

539

540 **Supplementary Figure 3.** Frequency and significance of EAC non-coding drivers from  
541 ActiveDriverWGS. **a.** The observed and expected mutation counts found on each element in  
542 ActiveDriverWGS. **b.** The *fdr* for each element in ActiveDriverWGS.

543

544 **Supplementary Figure 4.** Frequency of Extrachromosomal like events (CN adjusted Ploidy >10)  
545 in GISTIC amplification peaks and presence of high confidence drivers in those peaks indicated.

546

547 **Supplementary figure 5. Examples of Normal amplification (PLiody-adjusted CN >2 & <10) and**  
548 **Extrachromosomal-like amplification (ploidy-adjusted CN >10) events.** 1-10 = Extrachromosomal-  
549 like amplification and 11-20 = Normal amplification events. Events were picked at random using  
550 runif() function in R. SV and CNAs surrounding events are shown. Features indicative of  
551 extrachromosomal double minute (DM) formations include sharp, large CN steps, SVs with high read  
552 support at the edges of these steps and when not derived from a continuous region of the genome  
553 CN regions in the DM may have the same CN status (taking into account other additional events  
554 which may have occurred in that region). These features are enriched in the extrachromosomal-like  
555 events, although example 20 may be a low-copy number extrachromosomal event. It should be  
556 noted that SV calling using short read sequencing techniques such as in this study has a relatively  
557 low sensitivity and accuracy for the precise localisation of many SV break points. Examples continue  
558 over four pages.

559

560 **Supplementary Figure 6.** A scheme demonstrating how to use mutational clustering along with dnds  
561 ratios to estimate the probability of a particular mutation being a driver. In this case the dnds ratio  
562 suggests 2/3 of missense mutations are drivers hence 10/15. 8 missense mutation lie in a mutational  
563 cluster, in this case of known significance in the N-terminal of B-Catenin, making it likely that these  
564 are drivers and hence most (2/7) other mutations are passengers. Similarly, mutations on amino  
565 acids known to be hyper mutated in other cancer types (see Supplementary table 5, for instance if  
566 we found a single KRAS G12 mutation) can be considered likely drivers.

567

568 **Supplementary Figure 7. Hierarchical Clustering of samples based on presence of driver variants**  
569 **with genes ordered by pathway membership.**

570

571 **Supplementary Figure 8.** A detailed breakdown of mutation and copy number types per case and a  
572 breakdown of exome wide dnds excess for different mutation types (note that exome wide indel  
573 cannot be calculated excess as they have no synonymous mutation equivalent, although a null  
574 model is used in the per gene dnds method to use them to detect driver genes). Error bars indicate  
575 95% confidence intervals for exome-wide dnds mutation excess assessment.

576

577 **Supplementary Figure 9.** TP53 expression in different TP53 mutation types in comparison to TP53  
578 WT tumours and normal duodenum and gastric cardia tissues.

579

580 **Supplementary Figure 10.** Expression of all EAC driver genes across different genomic states for the  
581 gene in question in 116 EAC tumours, and in comparison to duodenum and gastric cardia tissues.

582

583 **Supplementary Figure 11.** Growth inhibition responses of EAC cell lines and control lines to CDK4/6  
584 inhibitors Palbociclib and Ribociclib. A subset of cell lines also received treatment with Abemaciclib  
585 which shows efficacy in such cell lines as well as in organoids (Fig 6C).

586

## 587 **Methods**

### 588 **Cohort, sequencing and calling of genomic events**

589 380 cases (69%) of our EAC cohort were derived from the esophageal adenocarcinoma WGS ICGC  
590 study, for which samples are collected through the UK wide OCCAMS (Oesophageal Cancer  
591 Classification and Molecular Stratification) consortium. The procedures for obtaining the samples,  
592 quality control processes, extractions and whole genome sequencing are as previously described<sup>18</sup>.

593 Strict pathology consensus review was observed for these samples with a 70% cellularity  
594 requirement before inclusion. Comprehensive clinical information was available for the ICGC-  
595 OCCAMS cases. In addition, previously published samples were included in the analysis from Dulak  
596 et al 2013<sup>20</sup> – 139 WES and 10 WGS (total 27%) and Nones et al 2014<sup>21</sup> with 22 WGS samples (4%) to  
597 total 551 genome characterised EACs. RNA-seq data was available from our ICGC WGS samples  
598 (116/380). BAM files for all samples (include those from Dulak et al 2013 and Nones et al 2014) were  
599 run through our alignment (BWA-MEM), mutation (Strelka), copy number (ASCAT) and structural  
600 variant (Manta) calling pipelines, as previously described<sup>18</sup>. Our methods were benchmarked against  
601 various other available methods and have among the best sensitivity and specificity for variant  
602 calling (ICGC benchmarking exercise<sup>53</sup>). Mutation and copy number calling on cell lines was  
603 performed as previously described<sup>46</sup>.

604 Total RNA was extracted using All Prep DNA/RNA kit from Qiagen and the quality was checked on  
605 Agilent 2100 Bioanalyzer using RNA 6000 nano kit (Agilent). Qubit High sensitivity RNA assay kit from  
606 thermo fisher was used for quantification. Libraries were prepared from 250ng RNA, using TruSeq  
607 Stranded Total RNA Library Prep Gold (Ribo-zero) kit and ribosomal RNA (nuclear, cytoplasmic and  
608 mitochondrial rRNA) was depleted, whereby biotinylated probes selectively bind to ribosomal RNA  
609 molecules forming probe-rRNA hybrids. These hybrids were pulled down using magnetic beads and  
610 rRNA depleted total RNA was reverse transcribed. The libraries were prepared according to Illumina  
611 protocol<sup>54</sup>. Paired end 75bp sequencing on HiSeq4000 generated the paired end reads. For normal  
612 expression controls we chose gastric cardia tissue, from which some hypothesise Barrett's may arise,  
613 and duodenum which contains intestinal histology, including goblet cells, which mimics that of  
614 Barrett's. We did not use Barrett's tissue itself as a normal control given the heterogeneous and  
615 plentiful phenotypic and genomic changes which it undergoes early in its pathogenesis.

616

617



618

## 619 **Analysing EAC mutations for selection**

620 To detect positively selected mutations in our EAC cohort, a multi-tool approach across various  
621 selection related 'Features' (Recurrence, Functional impact, Clustering) was implemented in order to  
622 provide a comprehensive analysis. This is broadly similar to several previous approaches<sup>8,12</sup>.  
623 dNdScv<sup>22</sup>, MutsigCV<sup>9</sup>, e-Driver<sup>26</sup>, ActivedriverWGS and e-Driver3D<sup>27</sup> were run using the default  
624 parameters. To run OncodriverFM<sup>24</sup>, Polyphen<sup>55</sup> and SIFT<sup>56</sup> were used to score the functional impact  
625 of each missense non-synonomous mutation (from 0, non-impactful to 1 highly impactful),  
626 synonymous mutation were given a score of 0 impact and truncating mutations (Non-sense and  
627 frameshift mutations) were given a score of 1. Any gene with less than 7 mutations, unlikely to  
628 contain detectable drivers using this method, was not considered to decrease the false discovery  
629 rate. OncodriveClust was run using a minimum cluster distance of 3, minimum number of mutations  
630 for a gene to be considered of 7 and with a stringent probability cut off to find cluster seeds of  $p =$   
631  $Ex10^{-13}$  to prevent infiltration of large numbers of, likely, false positive genes. For all tool outputs we  
632 undertook quality control including Q-Q plots to ensure no tool produces inflated q-values and each  
633 tool produced at least 30% known cancer genes. Two tools were removed from the analysis due to  
634 failure for both of these parameters at quality control (Activedriver<sup>57</sup> and Hotspot<sup>32</sup>). For three of the  
635 QC-approved tools (dNdScv, OncodriveFM, MutsigCV) where this was possible we also undertook an  
636 additional *fdr* reducing analysis by re-calculating q values based on analysis of known cancer genes  
637 only<sup>22,28,29</sup> as has been previously implemented<sup>22,58</sup>. Significance cut offs were set at  $q < 0.1$  for coding  
638 genes. Tool outputs were then put through various filters to remove any further possible false  
639 positive genes. Specifically, genes where <50% of EAC cases had no expression (TPM<0.1) in our  
640 matched RNA-seq cohort were removed and, using dNdScv, genes with no significant mutation  
641 excess (observed: expected ratio > 1.5:1) of any single mutation type were also removed. We also  
642 removed two (MT-MD2, MT-MD4) mitochondrial genes which were highly enriched for truncating

643 mutations and were frequently called in OncodriveFM as well as other tools. This is may be due to  
644 the different mutational dynamics, caused by ROS from the mitochondrial electron transport chain,  
645 and the high number of mitochondrial genomes per cell which enables significantly more  
646 heterogeneity. These factors prevent the tools used from calculating an accurate null model for  
647 these genes however they may be worthy of functional investigation. For non-coding elements  
648 called by ActivedriverWGS filtering for expression or dnds was not possible and despite recent  
649 benchmarking<sup>30</sup> are not so well established. Hence we took a more cautious approach with general  
650 significance cut offs of  $q < 0.001$  and  $q < 0.1$  for previously identified elements in PCAWG<sup>12</sup>. Q values  
651 were not recalculated for Driver elements only but  $q < 0.1$  for known elements was based on all  
652 elements. To calculate exome-wide mutational excess hypermutated cases (>500 exonic mutations)  
653 were removed and the global non-synonymous dnds ratios were applied to all dndscv annotated  
654 mutations excluding “synonymous” and “no SNV” annotations as described in Martincorena et al<sup>22</sup>.

655

#### 656 **Detecting selection in CNVs**

657 ASCAT raw CN values were used to detected frequently deleted or amplified regions of the genome  
658 using GISTIC2.0<sup>15</sup>. To determine which genes in these regions confer a selective advantage, CNVs  
659 from each gene within a GISTIC identified loci were correlated with TPM from matched RNA-seq in a  
660 sub-cohort of 116 samples and with mutations across all 551 samples. To call copy number in genes  
661 which spanned multiple copy number segments in ASCAT we considered the total number of full  
662 copies of the gene (ie the lowest total copy number). Occasionally ASCAT is unable to confidently call  
663 the copy number in a highly aberrant genomic regions. We found that the expression of genes in  
664 such regions matched well what we would expect given the surrounding copy number and hence we  
665 used the mean of the two adjacent copy number fragments to call copy number in the gene in  
666 question. We found amplification peak regions identified by GISTIC2.0 varied significantly in precise  
667 location both in analysis of different sub-cohorts and when comparing to published GISTIC data from

668 EACs<sup>10,16,17</sup>. A peak would often sit next to but not overlapping a well characterised oncogene or  
669 tumour suppressor. To account for this, we widened the amplification peak sizes upstream and  
670 downstream by twice the size of each peak to ensure we captured all possible drivers. Our  
671 expression analysis allows us to then remove false positives from this wider region and called drivers  
672 were still highly enriched for genes closer to the centre of GISTIC peak regions.

673 To detect genes in which amplification correlated with increased expression we compared  
674 expression of samples with a high CN for that gene (above 10<sup>th</sup> percentile CN/Ploidy) with those  
675 which have a normal CN (median +/- 1) using the Wilcox rank-sum test and using the specific  
676 alternative hypothesis that high CN would lead to increased expression. Q-values were then  
677 generated based on Benjamini & Hochberg method, not considering genes without significant  
678 expression in amplified samples (at least 75% amplified samples with TPM > 0.1) and considering  
679  $q < 0.001$  as significant. We also included an additional known driver gene only FDR reduction analysis  
680 as previously described for mutational drivers with  $q < 0.1$  considered as significant given the  
681 additional evidence for these genes in other cancer types. We also included MYC despite its  $q = 0.11$   
682 for expression correlation. This is due to frequent non-amplification associated overexpression of  
683 MYC when compared to normal controls and otherwise MYC is well evidence by a very close  
684 proximity to the peak centre (top 4 genes) and its high rate of amplification (19%). We took the  
685 same approach to detect genes in which homozygous deletion correlated with expression loss.  
686 Expression modulation was a highly specific marker for known CN driver genes and was not a  
687 widespread feature in most recurrently copy number variant genes. However, while expression  
688 modulation is a requirement for selection of CNV only drivers, it is not sufficient evidence alone and  
689 hence we grouped such genes into those which have been characterised as drivers previously in  
690 other cancer types (high confidence EAC CN drivers) and other genes (Candidate EAC CN drivers)  
691 which await functional validation. We used fragile site regions detected in Wala et al 2017<sup>59</sup>. We also  
692 defined regions which may be recurrently heterozygous deleted, without any significant expression  
693 modulations, to allow LOH of tumour suppressor gene mutations. To do this we analysed genes with

694 at least 5 mutations in the matched RNA cohort for association between LOH (ASCAT minor allele =  
695 0) and mutation using fisher's exact test and generated q values using the Benjamini & Hochberg  
696 method. The analysis was repeated on known cancer genes only for reduced FDR and  $q < 0.05$   
697 considered significant for both analyses. For those high confidence drivers we chose to define  
698 amplification as CN/ploidy (referred to as Ploidy adjusted copy number) this produces superior  
699 correlation with expression. We chose a cut off for amplification at CN/ploidy = 2 as has been  
700 previously used, and as causes a highly significant increase in expression in our CN-driver genes.

701

## 702 **Pathways and relative distributions of genomic events**

703 The relative distribution of driver events in each pathway was analysed using a fisher's exact test in  
704 the case of pair-wise comparisons including WT cases. In the case of multi-gene comparisons such as  
705 the Cyclins we calculate the p value and odds ratio for each pair in the group by fisher's exact test  
706 and combine p values using the Fisher method, Genes without comparable Odds ratios to the rest of  
707 the genes in question were removed. For this analysis we also remove highly mutated cases (>500  
708 exonic mutations, 41/551) as they bias distribution of genes towards co-occurrence. We repeated  
709 this analyses across all pairs of driver genes using BH multiple hypothesis correction. We validated  
710 these relationships in independent TCGA cohorts of other GI cancers where we could find cohorts  
711 with reasonable numbers of the genomic events in question (not possible for GATA4/6 for instance)  
712 using the cBioportal web interface tool<sup>60</sup>.

713

## 714 **Correlating genomics with the clinical phenotype**

715 To find genomic markers for prognosis we undertook univariate Cox regression for those driver  
716 genes present in >5% of cases (16) along with Benjamini & Hochberg false discovery correction. We  
717 considered only these genes to reduce our false discover rate and because other genes were unlikely

718 to impact on clinical practise given their low frequency in EAC. We validated SMAD4, in the TCGA  
719 gastroesophageal cohort which had a comparable frequency of these events, but notably is  
720 composed mainly of gastric cancers, and GATA4 in the TCGA pancreatic cohort using the cBioportal  
721 web interface tool. We also validated these markers as independent predictors of survival both in  
722 respect of each other and stage using a multivariate Cox regression in our 551 case cohort. When  
723 assessing for genomic correlates with differentiation phenotypes we found only very few cases with  
724 well differentiated phenotypes (<5% cases) and hence for statistical analyses we collapse these cases  
725 with moderate differentiation to allow a binary fisher's exact test to compare poorly differentiated  
726 with well-moderate differentiated phenotypes.

727

## 728 **Therapeutics**

729 The cancer biomarker database was filtered for drugs linked to biomarkers found in EAC drivers and  
730 supplementary table 6 constructed using the cohort frequencies of EAC biomarkers. 10 EAC cell lines  
731 (SKGT4, OACP4C, OACM5.1, ESO26, ESO51, OE33, MFD, OE19, Flo-1 and JHesoAD) and 3 BE high  
732 grade dysplasia cell lines (CP-B, CP-C and CP-D) with WGS data<sup>46</sup> were used in proliferation assays to  
733 determine drug sensitivity to CDK4/6 inhibitors, Palbociclib (Biovision) and Ribociclib (Selleckchem).  
734 Cell lines were grown in their normal growth media (methods table 1). Proliferation was measured  
735 using the Incucyte live cell analysis system (Incucyte ZOOM Essen biosciences). Each cell line was  
736 plated at a starting confluency of 10% and growth rate measured across 4-7 days depending on basal  
737 proliferation rate. For each cell-line drug combination concentrations of 16, 64, 250, 1000 and 4000  
738 nanomolar were used each in 0.3% DMSO and compared to 0.3% DMSO only. Each condition was  
739 performed in at least triplicate. The time period of the exponential growth phase in the untreated  
740 (0.3% DMSO) condition was used to calculate GI50 and AUC. Accurate GI50s could not be calculated  
741 in cases where a cell line had >50% proliferation inhibition even with the highest drug concentration  
742 and hence AUC was used to compare cell line sensitivity. T47D had a highly similar GI50 for

743 Palbociclib to that previously calculated in other studies (112 nM vs 127 nM)<sup>61</sup>. Primary organoid  
744 cultures were derived from EAC cases included in the OCCAMS/ICGC sequencing study. Detailed  
745 organoid culture and derivation method have been previously described (cite nat comms Li et al).  
746 Regarding the drug treatment, the seeding density for each line was optimised to ensure cell growth  
747 in the logarithmic growth phase. Cells were seeded in complete medium for 24 hours then treated  
748 with compounds at a 5-point 4-fold serial dilutions for 6 days or 12 days. Cell viability was assessed  
749 using CellTiter-Glo (Promega) after drug incubation.

## 750 References

- 751 1. Ferlay J, Soerjomataram I, Dikshit R, et al. Cancer incidence and mortality worldwide:  
752 sources, methods and major patterns in GLOBOCAN 2012. *Int J Cancer*. Mar 1  
753 2015;136(5):E359-386.
- 754 2. Coleman HG, Xie SH, Lagergren J. The Epidemiology of Esophageal Adenocarcinoma.  
755 *Gastroenterology*. Jan 2018;154(2):390-405.
- 756 3. Smyth EC, Lagergren J, Fitzgerald RC, et al. Oesophageal cancer. *Nat Rev Dis Primers*. Jul 27  
757 2017;3:17048.
- 758 4. Campbell PJ, Getz G, Stuart JM, Korbel JO, Stein LD. Pan-cancer analysis of whole genomes.  
759 *bioRxiv*. 2017.
- 760 5. Ciriello G, Miller ML, Aksoy BA, Senbabaoglu Y, Schultz N, Sander C. Emerging landscape of  
761 oncogenic signatures across human cancers. *Nat Genet*. Oct 2013;45(10):1127-1133.
- 762 6. Secrier M, Li X, de Silva N, et al. Mutational signatures in esophageal adenocarcinoma define  
763 etiologically distinct subgroups with therapeutic relevance. *Nat Genet*. Oct  
764 2016;48(10):1131-1141.
- 765 7. Stratton MR, Futreal PA. Cancer: understanding the target. *Nature*. Jul 1 2004;430(6995):30.
- 766 8. Tamborero D, Gonzalez-Perez A, Perez-Llamas C, et al. Comprehensive identification of  
767 mutational cancer driver genes across 12 tumor types. *Sci Rep*. Oct 2 2013;3:2650.
- 768 9. Lawrence MS, Stojanov P, Polak P, et al. Mutational heterogeneity in cancer and the search  
769 for new cancer-associated genes. *Nature*. Jul 11 2013;499(7457):214-218.
- 770 10. Integrated genomic characterization of oesophageal carcinoma. *Nature*. Jan 12  
771 2017;541(7636):169-175.
- 772 11. Lin DC, Dinh HQ, Xie JJ, et al. Identification of distinct mutational patterns and new driver  
773 genes in oesophageal squamous cell carcinomas and adenocarcinomas. *Gut*. Aug 31 2017.
- 774 12. Rheinbay E, Nielsen MM, Abascal F, et al. Discovery and characterization of coding and non-  
775 coding driver mutations in more than 2,500 whole cancer genomes. *bioRxiv*. 2017.
- 776 13. Comprehensive molecular characterization of urothelial bladder carcinoma. *Nature*. Mar 20  
777 2014;507(7492):315-322.
- 778 14. Comprehensive molecular characterization of gastric adenocarcinoma. *Nature*. Sep 11  
779 2014;513(7517):202-209.
- 780 15. Mermel CH, Schumacher SE, Hill B, Meyerson ML, Beroukhi R, Getz G. GISTIC2.0 facilitates  
781 sensitive and confident localization of the targets of focal somatic copy-number alteration in  
782 human cancers. *Genome Biol*. 2011;12(4):R41.

- 783 16. Dulak AM, Schumacher SE, van Lieshout J, et al. Gastrointestinal adenocarcinomas of the  
784 esophagus, stomach, and colon exhibit distinct patterns of genome instability and  
785 oncogenesis. *Cancer Res.* Sep 1 2012;72(17):4383-4393.
- 786 17. Frankel A, Armour N, Nancarrow D, et al. Genome-wide analysis of esophageal  
787 adenocarcinoma yields specific copy number aberrations that correlate with prognosis.  
788 *Genes Chromosomes Cancer.* Apr 2014;53(4):324-338.
- 789 18. Secrier M, Fitzgerald RC. Signatures of Mutational Processes and Associated Risk Factors in  
790 Esophageal Squamous Cell Carcinoma: A Geographically Independent Stratification Strategy?  
791 *Gastroenterology.* May 2016;150(5):1080-1083.
- 792 19. Zack TI, Schumacher SE, Carter SL, et al. Pan-cancer patterns of somatic copy number  
793 alteration. *Nat Genet.* Oct 2013;45(10):1134-1140.
- 794 20. Dulak AM, Stojanov P, Peng S, et al. Exome and whole-genome sequencing of esophageal  
795 adenocarcinoma identifies recurrent driver events and mutational complexity. *Nat Genet.*  
796 May 2013;45(5):478-486.
- 797 21. Nones K, Waddell N, Wayte N, et al. Genomic catastrophes frequently arise in esophageal  
798 adenocarcinoma and drive tumorigenesis. *Nat Commun.* Oct 29 2014;5:5224.
- 799 22. Martincorena I, Raine KM, Gerstung M, et al. Universal Patterns of Selection in Cancer and  
800 Somatic Tissues. *Cell.* Nov 16 2017;171(5):1029-1041 e1021.
- 801 23. Wadi L, Uuskula-Reimand L, Isaev K, et al. Candidate cancer driver mutations in super-  
802 enhancers and long-range chromatin interaction networks. *bioRxiv.* 2017.
- 803 24. Gonzalez-Perez A, Lopez-Bigas N. Functional impact bias reveals cancer drivers. *Nucleic Acids*  
804 *Res.* Nov 2012;40(21):e169.
- 805 25. Tamborero D, Gonzalez-Perez A, Lopez-Bigas N. OncodriveCLUST: exploiting the positional  
806 clustering of somatic mutations to identify cancer genes. *Bioinformatics.* Sep 15  
807 2013;29(18):2238-2244.
- 808 26. Porta-Pardo E, Godzik A. e-Driver: a novel method to identify protein regions driving cancer.  
809 *Bioinformatics.* Nov 1 2014;30(21):3109-3114.
- 810 27. Porta-Pardo E, Hrabe T, Godzik A. Cancer3D: understanding cancer mutations through  
811 protein structures. *Nucleic Acids Res.* Jan 2015;43(Database issue):D968-973.
- 812 28. Futreal PA, Coin L, Marshall M, et al. A census of human cancer genes. *Nat Rev Cancer.* Mar  
813 2004;4(3):177-183.
- 814 29. Kandoth C, McLellan MD, Vandin F, et al. Mutational landscape and significance across 12  
815 major cancer types. *Nature.* Oct 17 2013;502(7471):333-339.
- 816 30. Shuai S, Gallinger S, Stein LD. DriverPower: Combined burden and functional impact tests for  
817 cancer driver discovery. *bioRxiv.* 2017.
- 818 31. Taylor AM, Shih J, Ha G, et al. Genomic and Functional Approaches to Understanding Cancer  
819 Aneuploidy. *Cancer cell.* Apr 9 2018;33(4):676-689 e673.
- 820 32. Chang MT, Asthana S, Gao SP, et al. Identifying recurrent mutations in cancer reveals  
821 widespread lineage diversity and mutational specificity. *Nat Biotechnol.* Feb 2016;34(2):155-  
822 163.
- 823 33. Zaretsky JM, Garcia-Diaz A, Shin DS, et al. Mutations Associated with Acquired Resistance to  
824 PD-1 Blockade in Melanoma. *N Engl J Med.* Sep 1 2016;375(9):819-829.
- 825 34. Chen Z, Shi T, Zhang L, et al. Mammalian drug efflux transporters of the ATP binding cassette  
826 (ABC) family in multidrug resistance: A review of the past decade. *Cancer Lett.* Jan 1  
827 2016;370(1):153-164.
- 828 35. Giannakis M, Mu XJ, Shukla SA, et al. Genomic Correlates of Immune-Cell Infiltrates in  
829 Colorectal Carcinoma. *Cell reports.* Oct 18 2016;17(4):1206.
- 830 36. Pei XH, Xiong Y. Biochemical and cellular mechanisms of mammalian CDK inhibitors: a few  
831 unresolved issues. *Oncogene.* Apr 18 2005;24(17):2787-2795.
- 832 37. Comprehensive molecular characterization of human colon and rectal cancer. *Nature.* Jul 18  
833 2012;487(7407):330-337.

- 834 38. Waddell N, Pajic M, Patch AM, et al. Whole genomes redefine the mutational landscape of  
835 pancreatic cancer. *Nature*. Feb 26 2015;518(7540):495-501.
- 836 39. Leiserson MD, Vandin F, Wu HT, et al. Pan-cancer network analysis identifies combinations  
837 of rare somatic mutations across pathways and protein complexes. *Nat Genet*. Feb  
838 2015;47(2):106-114.
- 839 40. Grasso CS, Giannakis M, Wells DK, et al. Genetic Mechanisms of Immune Evasion in  
840 Colorectal Cancer. *Cancer discovery*. Jun 2018;8(6):730-749.
- 841 41. Singhi AD, Foxwell TJ, Nason K, et al. Smad4 loss in esophageal adenocarcinoma is associated  
842 with an increased propensity for disease recurrence and poor survival. *Am J Surg Pathol*. Apr  
843 2015;39(4):487-495.
- 844 42. Levy L, Hill CS. Alterations in components of the TGF-beta superfamily signaling pathways in  
845 human cancer. *Cytokine Growth Factor Rev*. Feb-Apr 2006;17(1-2):41-58.
- 846 43. Tamborero D, Rubio-Perez C, Deu-Pons J, et al. Cancer Genome Interpreter Annotates The  
847 Biological And Clinical Relevance Of Tumor Alterations. *bioRxiv*. 2017.
- 848 44. Weaver JMJ, Ross-Innes CS, Shannon N, et al. Ordering of mutations in preinvasive disease  
849 stages of esophageal carcinogenesis. *Nature genetics*. Aug 2014;46(8):837-843.
- 850 45. Ross-Innes CS, Becq J, Warren A, et al. Whole-genome sequencing provides new insights into  
851 the clonal architecture of Barrett's esophagus and esophageal adenocarcinoma. *Nature*  
852 *genetics*. Sep 2015;47(9):1038-1046.
- 853 46. Contino G, Eldridge MD, Secrier M, et al. Whole-genome sequencing of nine esophageal  
854 adenocarcinoma cell lines. *F1000Res*. 2016;5:1336.
- 855 47. Liston DR, Davis M. Clinically Relevant Concentrations of Anticancer Drugs: A Guide for  
856 Nonclinical Studies. *Clin Cancer Res*. Jul 15 2017;23(14):3489-3498.
- 857 48. Herrera-Abreu MT, Palafox M, Asghar U, et al. Early Adaptation and Acquired Resistance to  
858 CDK4/6 Inhibition in Estrogen Receptor-Positive Breast Cancer. *Cancer Res*. Apr 15  
859 2016;76(8):2301-2313.
- 860 49. Li X, Francies HE, Secrier M, et al. Organoid cultures recapitulate esophageal  
861 adenocarcinoma heterogeneity providing a model for clonality studies and precision  
862 therapeutics. *Nature communications*. Jul 30 2018;9(1):2983.
- 863 50. Patnaik A, Rosen LS, Tolaney SM, et al. Efficacy and Safety of Abemaciclib, an Inhibitor of  
864 CDK4 and CDK6, for Patients with Breast Cancer, Non-Small Cell Lung Cancer, and Other  
865 Solid Tumors. *Cancer discovery*. Jul 2016;6(7):740-753.
- 866 51. D'Antonio M, Ciccarelli FD. Integrated analysis of recurrent properties of cancer genes to  
867 identify novel drivers. *Genome Biol*. May 29 2013;14(5):R52.
- 868 52. Zehir A, Benayed R, Shah RH, et al. Mutational landscape of metastatic cancer revealed from  
869 prospective clinical sequencing of 10,000 patients. *Nat Med*. Jun 2017;23(6):703-713.
- 870 53. Ding J, McConechy MK, Horlings HM, et al. Systematic analysis of somatic mutations  
871 impacting gene expression in 12 tumour types. *Nat Commun*. Oct 5 2015;6:8554.
- 872 54. Nagai K, Kohno K, Chiba M, et al. Differential expression profiles of sense and antisense  
873 transcripts between HCV-associated hepatocellular carcinoma and corresponding non-  
874 cancerous liver tissue. *Int J Oncol*. Jun 2012;40(6):1813-1820.
- 875 55. Adzhubei I, Jordan DM, Sunyaev SR. Predicting functional effect of human missense  
876 mutations using PolyPhen-2. *Curr Protoc Hum Genet*. Jan 2013;Chapter 7:Unit7 20.
- 877 56. Ng PC, Henikoff S. Predicting the effects of amino acid substitutions on protein function.  
878 *Annu Rev Genomics Hum Genet*. 2006;7:61-80.
- 879 57. Reimand J, Wagih O, Bader GD. The mutational landscape of phosphorylation signaling in  
880 cancer. *Sci Rep*. Oct 2 2013;3:2651.
- 881 58. Northcott PA, Buchhalter I, Morrissy AS, et al. The whole-genome landscape of  
882 medulloblastoma subtypes. *Nature*. Jul 19 2017;547(7663):311-317.
- 883 59. Wala JA, Shapira O, Li Y, et al. Selective and mechanistic sources of recurrent  
884 rearrangements across the cancer genome. *bioRxiv*. 2017.



- 885 60. Gao J, Aksoy BA, Dogrusoz U, et al. Integrative analysis of complex cancer genomics and  
886 clinical profiles using the cBioPortal. *Sci Signal*. Apr 2 2013;6(269):p11.
- 887 61. Finn RS, Dering J, Conklin D, et al. PD 0332991, a selective cyclin D kinase 4/6 inhibitor,  
888 preferentially inhibits proliferation of luminal estrogen receptor-positive human breast  
889 cancer cell lines in vitro. *Breast Cancer Res*. 2009;11(5):R77.
- 890

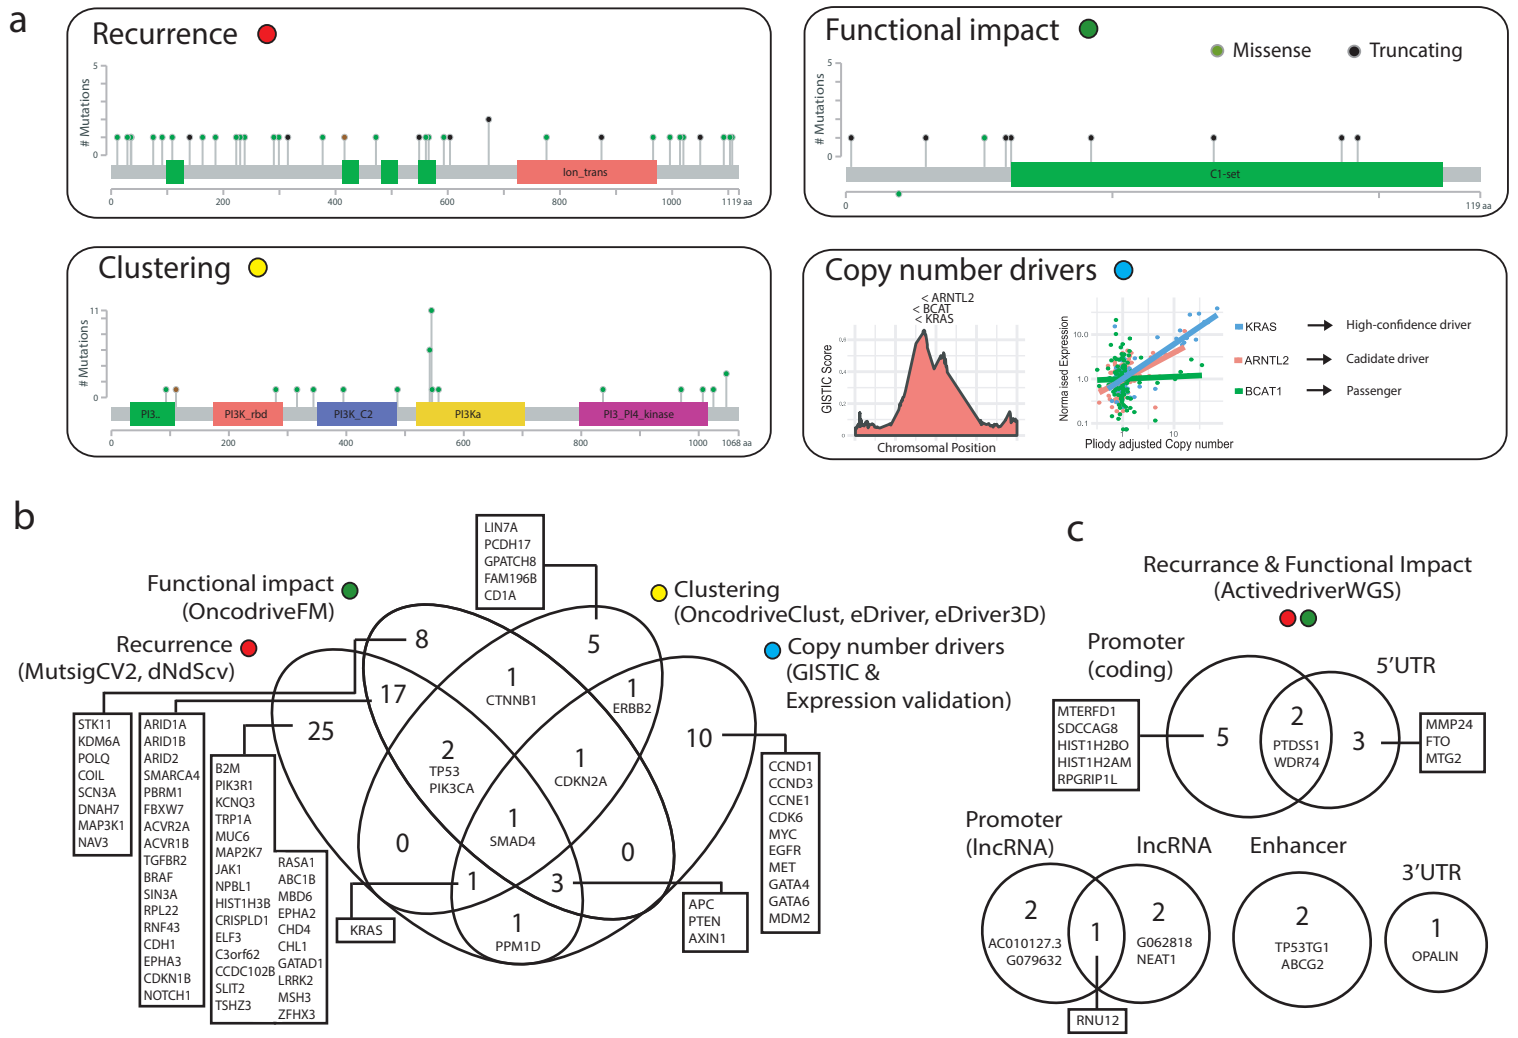

**Figure 1 Detection of EAC Driver Genes.** **a.** Types of driver-associated features used to detect positive selection in mutations and copy number events with examples of genes containing such features **b.** Coding driver genes identified and their driver-associated features. **c.** Non-coding driver elements detected and their element types.

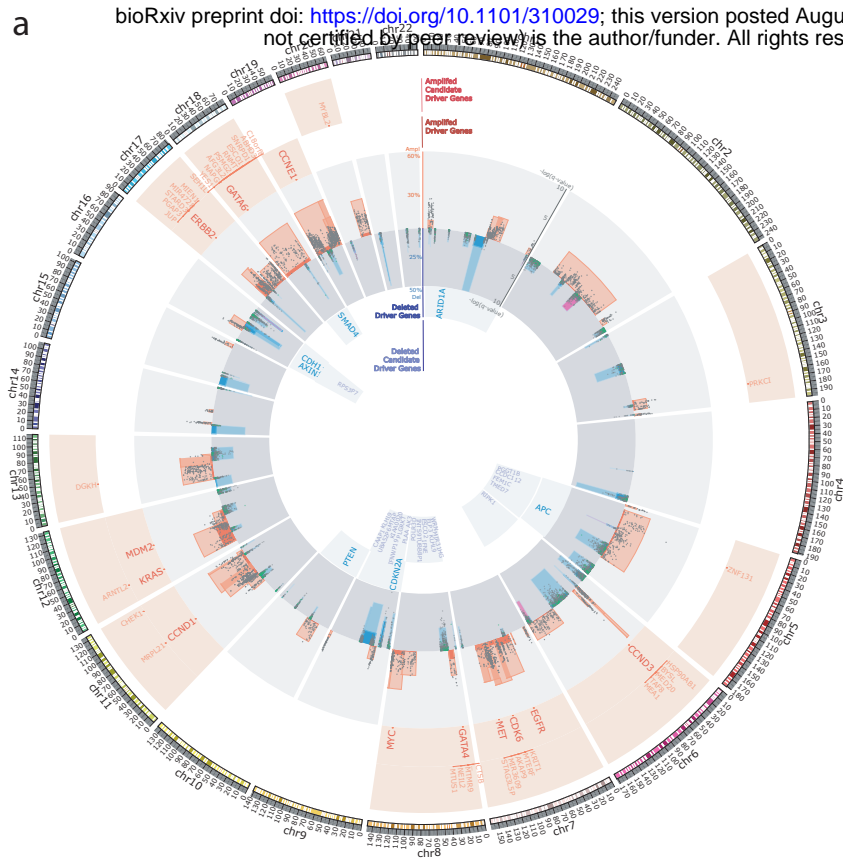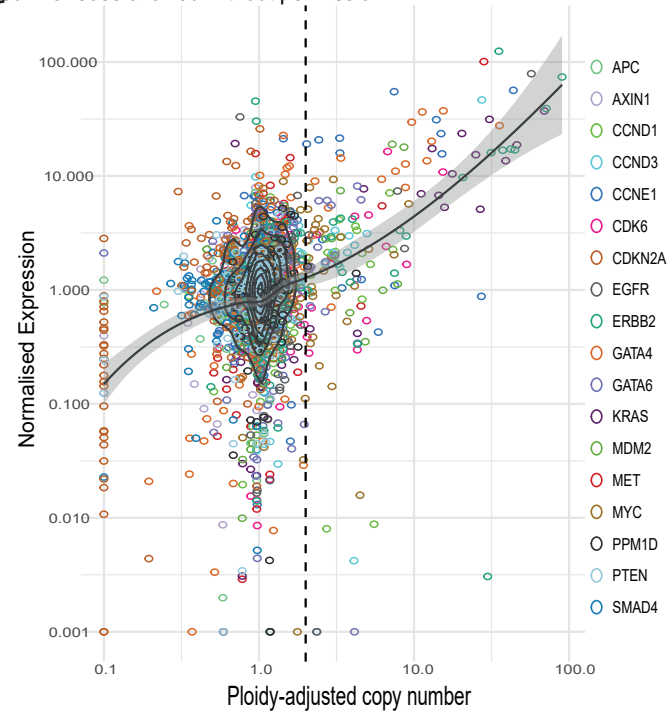

**Figure 2. Copy number variation under positive selection.**

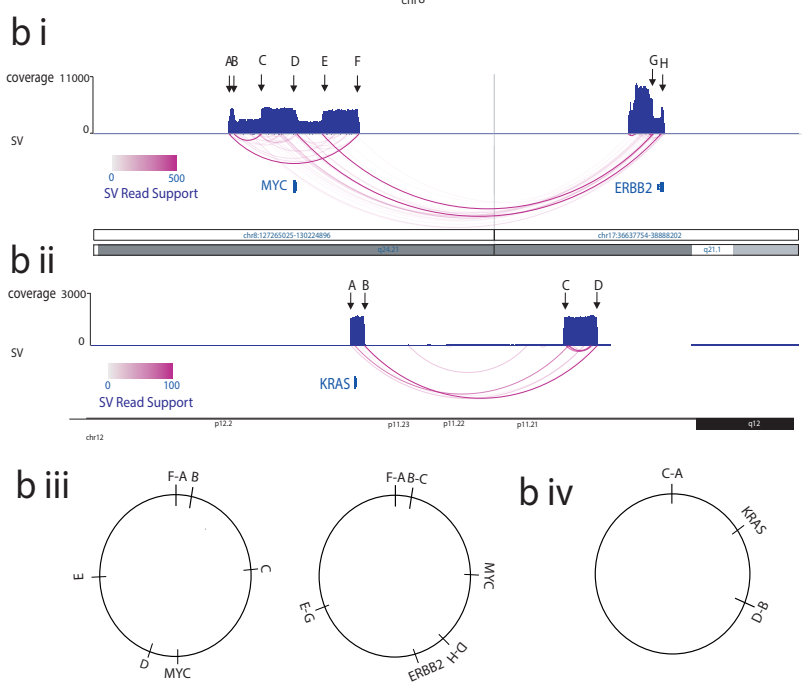

**a.** Recurrent copy number changes across the genome identified by GISTIC. Frequency of different CNV types are indicated as well as the position of CNV high confidence driver genes and candidate driver genes. The q value for expression correlation with amplification and homozygous deletion is shown for each gene within each amplification and deletion peaks respectively and occasions of significant association between LOH and mutation are indicated in green. Purple deletion peaks indicate fragile sites. **b.** Examples of extrachromosomal-like amplifications suggested by very high read support SVs at the boundaries of highly amplified regions produced from a single copy number step. In the first example (bi) two populations of extrachromosomal DNA are apparent (biii), one amplifying only MYC and the second also incorporating ERBB2 from a different chromosome. In the second example (bii) an inversion has occurred before circularization and amplification around KRAS (biv). **c.** Relationship between copy number and expression in CN driver genes.

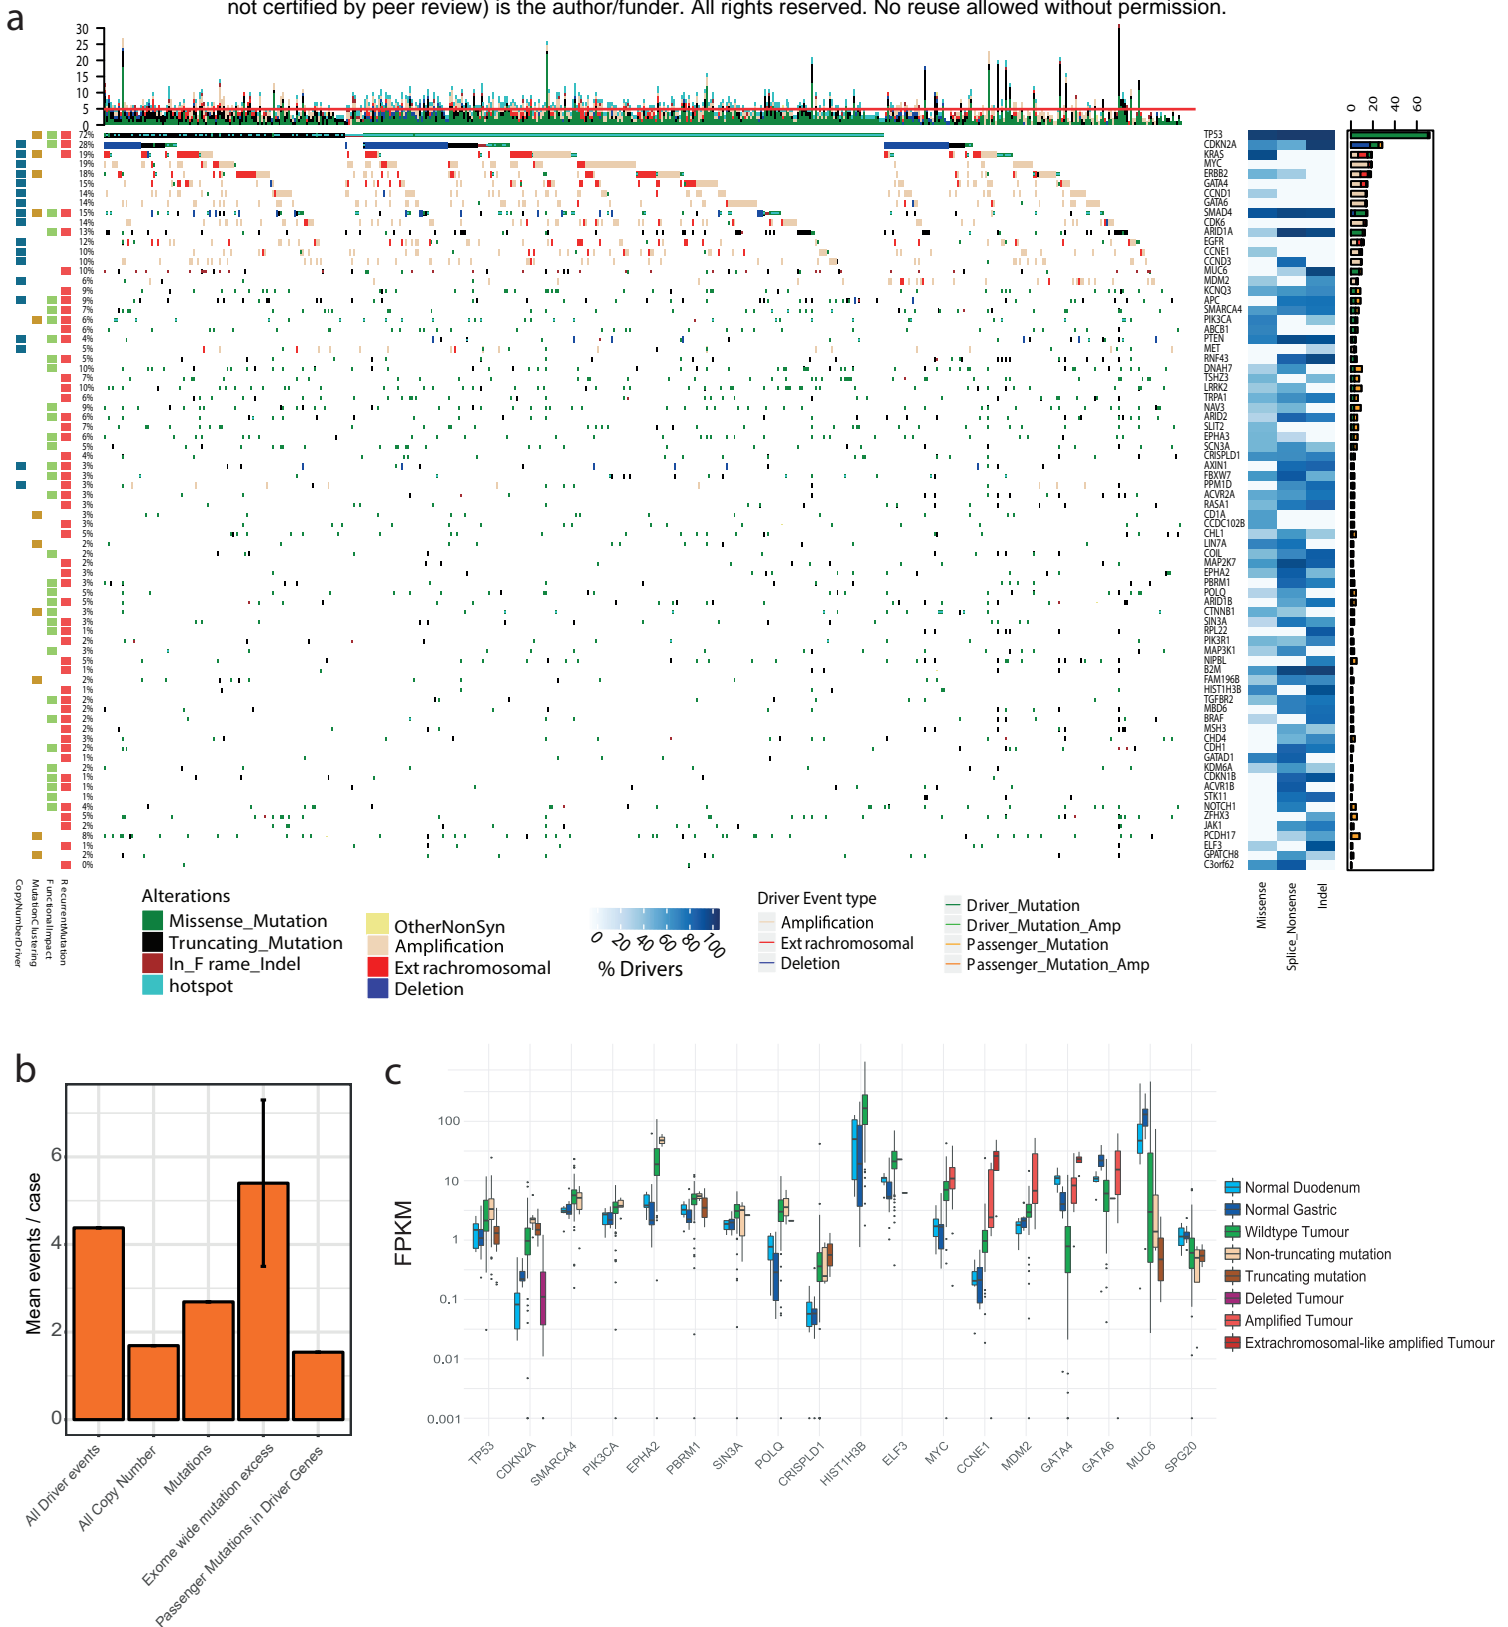

**Figure 3. The driver gene landscape of Esophageal Adenocarcinoma. a.** Driver mutations or CNVs are shown for each patient. Amplification is defined as  $>2$  Copy number adjusted ploidy ( $2 \times$  ploidy of that case) and extrachromosomal amplification as  $>10$  Copy number adjusted ploidy ( $10 \times$  ploidy for that case). Driver associated features for each driver gene are displayed to the left. On the right the percentages of different mutation and copy number changes are displayed, differentiating between driver and passenger mutations using dNdScv, and the % of predicted drivers by mutation type is shown. Above the plot are the number of driver mutations per sample with an indication of the median (red line = 5). **b.** Assessment of driver event types per case and comparison to exome-wide excess of mutations generated by dNdScv. **c.** Expression changes in EAC driver genes in comparison to normal intestinal tissues. Only genes with significant expression changes of note are shown.

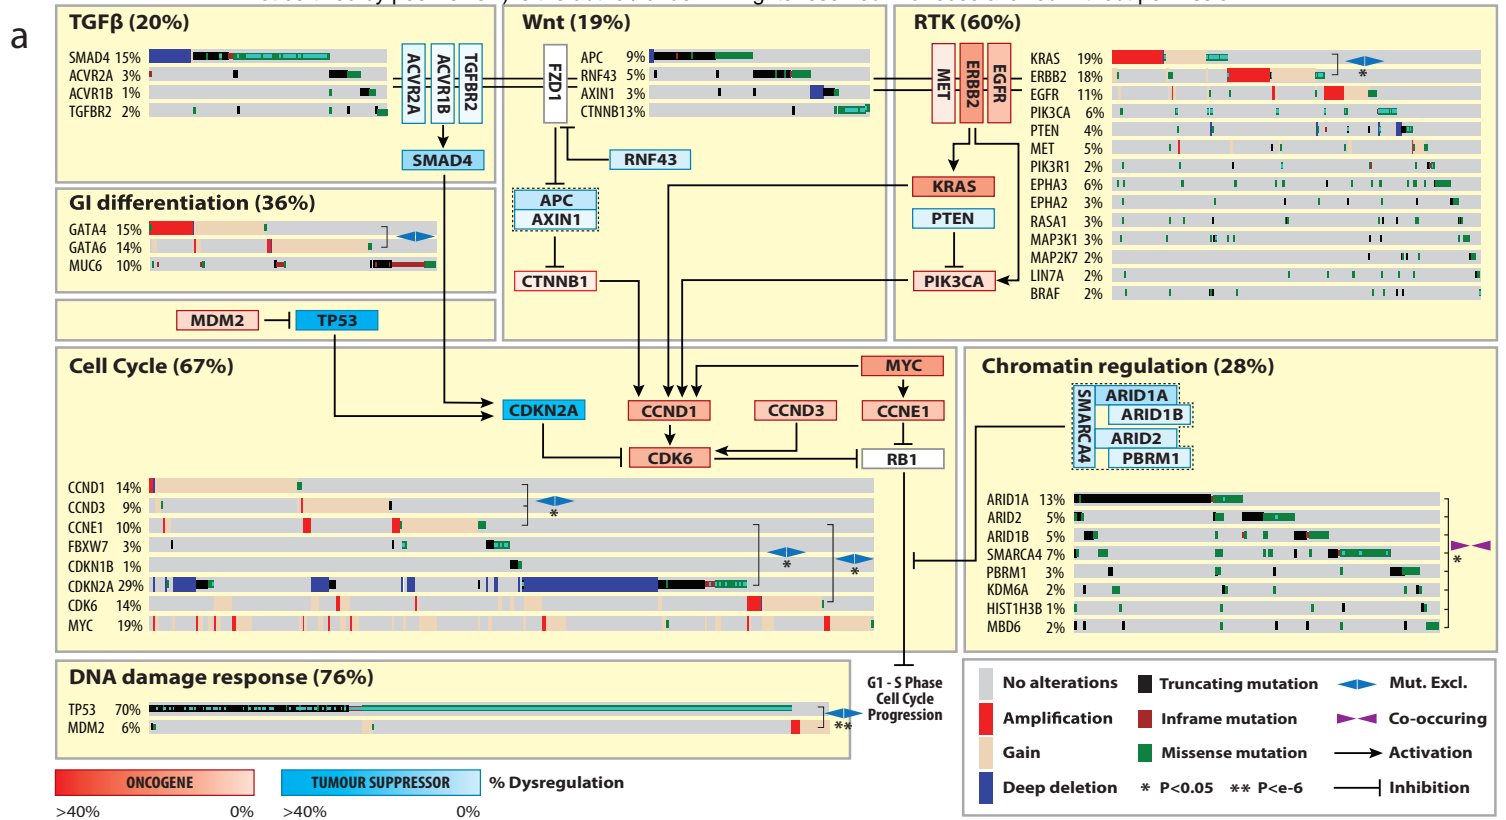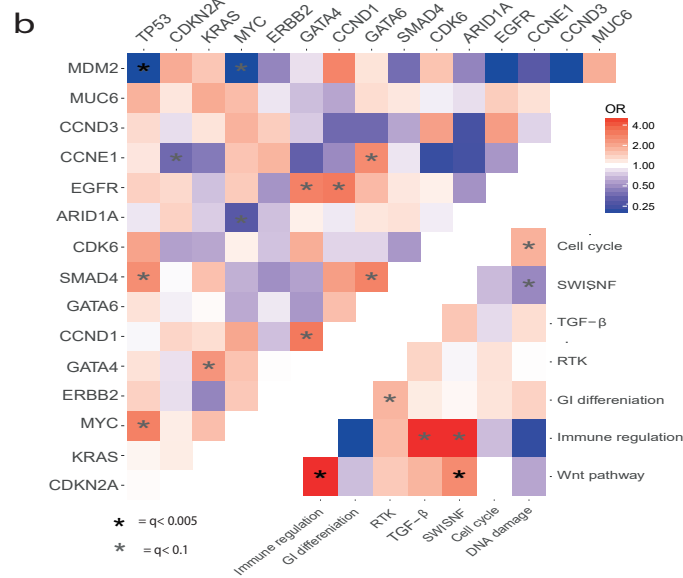

**Figure 4. Biological pathways undergoing selective dysregulation in EAC. a.** Biological Pathways dysregulated by driver gene mutation and/or CNVs. WT cases for a pathway are not shown. Mutual exclusivities and/or associations between genes in a pathway are annotated. GATA4/6 amplifications have a mutually exclusive relationship (ie GATA4 amplification is more common in GATA6 WT cases) although this does not reach statistical significance (fisher's exact test  $p=0.07$  OR =0.52). **b.** Pairwise assessment of mutual exclusivity and association in EAC driver genes and pathways.

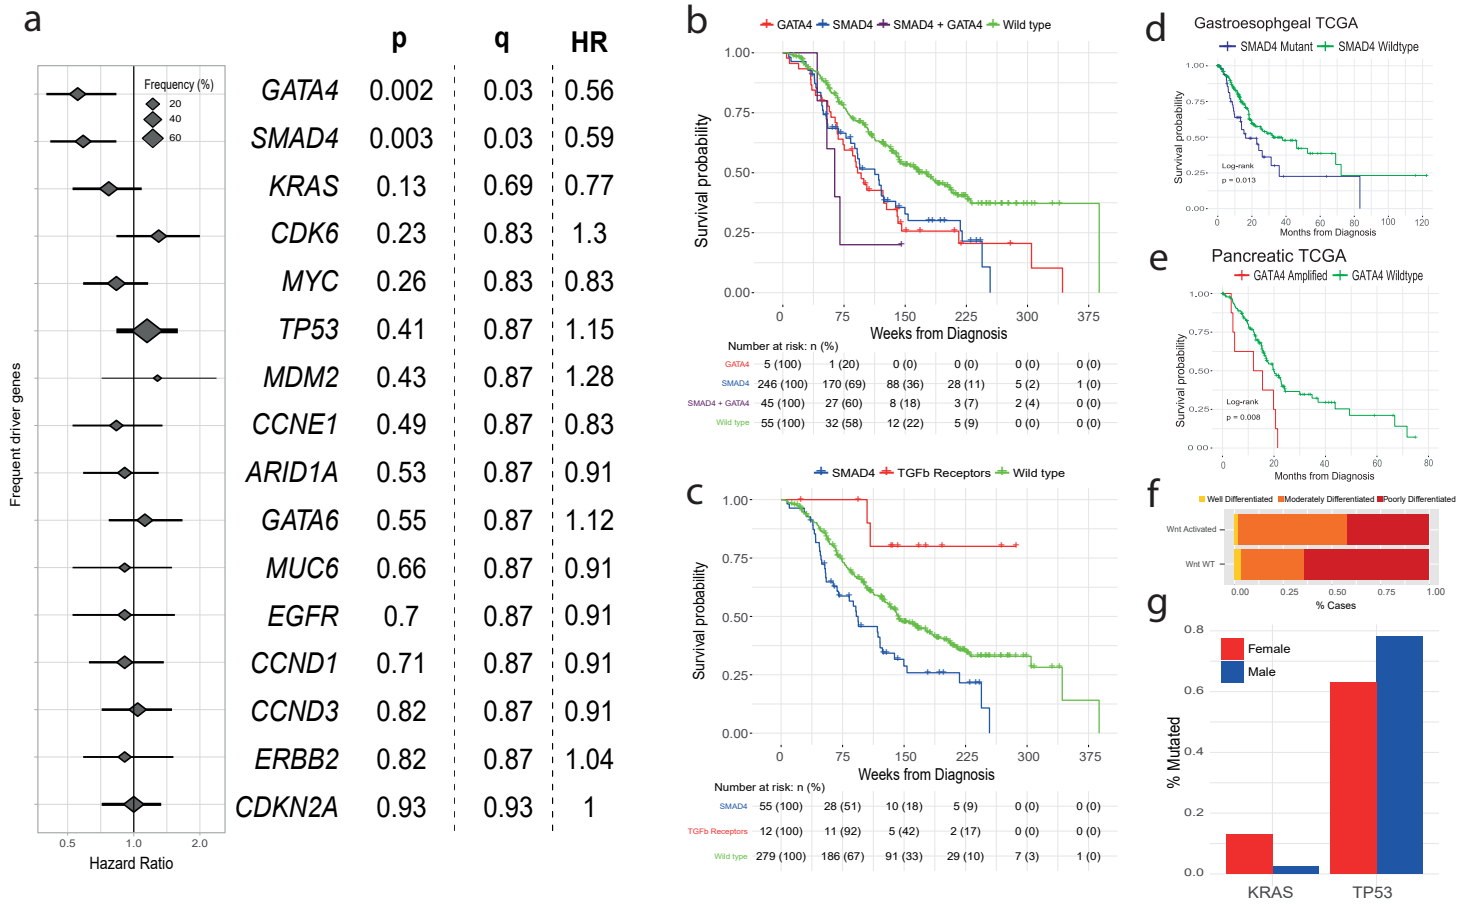

**Figure 5. Clinical significance of Driver events in EAC.** **a.** Hazard ratios and 95% confidence intervals for Cox regression analysis across all driver genes with at least a 5% frequency of driver alterations. P values are generated from the Wald test and q values generated using BH correction. **b.** Kaplan-Meier curves for EACs with different status of significant prognostic indicators (GATA4 and SMAD4). **c.** Kaplan-Meier curves for different alterations in the TGFbeta pathway. **d.** Kaplan-Meier curves showing verification GATA4 prognostic value in GI cancers using a pancreatic TCGA cohort. **e.** Kaplan-Meier curves showing verification SMAD4 prognostic value in gastroesophageal cancers using a gastroesophageal TCGA cohort. **f.** Differentiation bias in tumours containing events in Wnt pathway driver genes. **g.** Relative frequency of KRAS mutations and TP53 mutations driver gene events in females vs males (fisher's exact test).

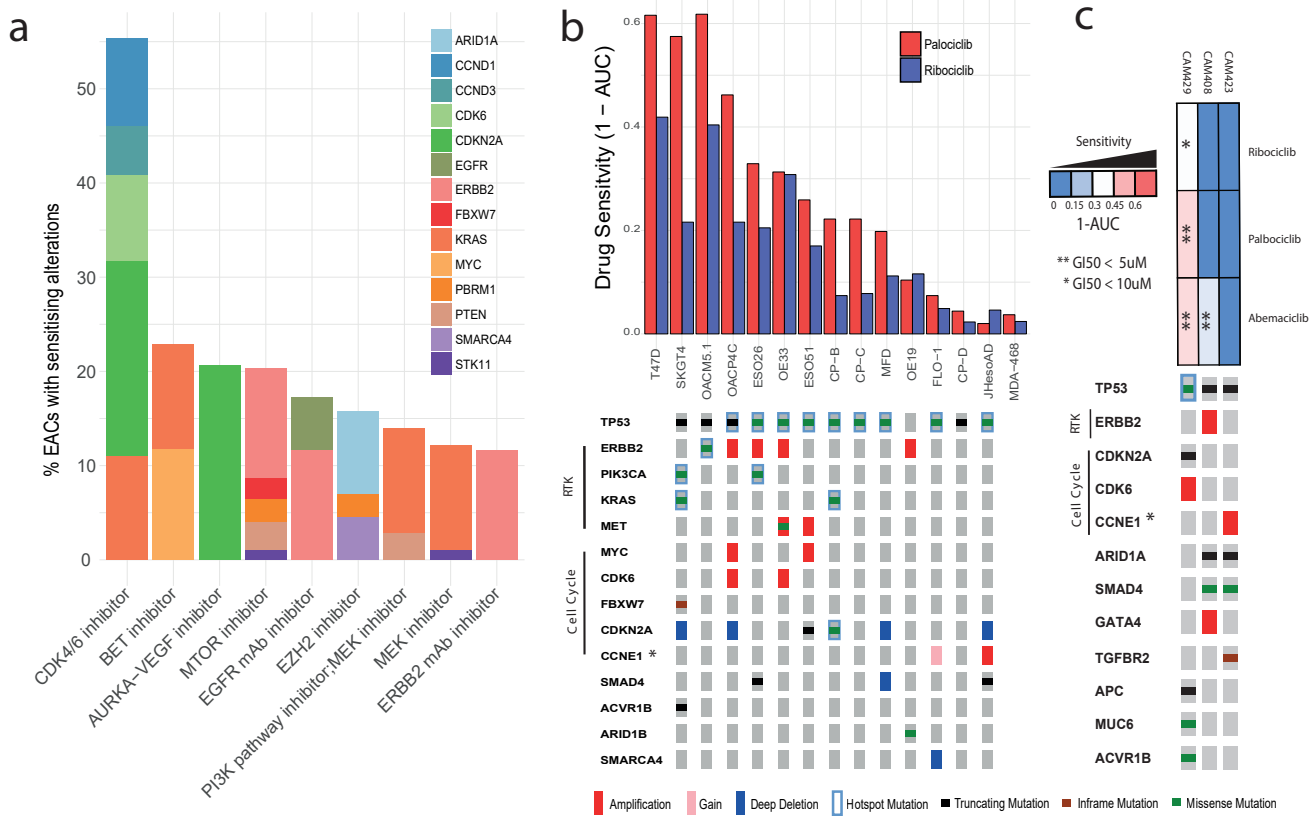

Source: https://www.biorxiv.org/content/10.1101/310029v2.full.pdf
